# Supplementary material for: Rare Chromone Derivatives from the Marine-Derived Penicillium citrinum with Anti-Cancer and Anti-Inflammatory Activities
Source: PubMed Central journal article supplement (PMC7827422; doi:10.3390/md19010025), 2021-01-08
Supplement: marinedrugs-19-00025-s001.pdf [file marinedrugs-19-00025-s001.pdf]

## Supplementary Materials

# Rare Chromone Derivatives from the Marine-Derived *Penicillium citrinum* with Anti-Cancer and Anti-Inflammatory Activities

Yi-Cheng Chu <sup>1</sup>, Chun-Hao Chang <sup>2</sup>, Hsiang-Ruei Liao <sup>3</sup>, Ming-Jen Cheng <sup>4</sup>, Ming-Der Wu <sup>4</sup>, Shu-Ling Fu <sup>1,\*</sup> and Jih-Jung Chen <sup>5,6,\*</sup>

<sup>1</sup> Institute of Traditional Medicine, School of Medicine, National Yang-Ming University, Taipei 112, Taiwan; xbox88888@ym.edu.tw (Y.-C.C.)

<sup>2</sup> Institute of Biopharmaceutical Sciences, Pharmaceutical Sciences, National Yang-Ming University, Taipei 112, Taiwan; howard860212@ym.edu.tw (C.-H.C.)

<sup>3</sup> Graduate Institute of Natural Products, College of Medicine, Chang Gung University, Taoyuan 333, Taiwan; liaoch@mail.cgu.edu.tw (H.-R.L.)

<sup>4</sup> Bioresource Collection and Research Center (BCRC), Food Industry Research and Development Institute (FIRDI), Hsinchu 300, Taiwan; cmj@firdi.org.tw (M.-J.C.); wmd@firdi.org.tw (M.-D.W.)

<sup>5</sup> Faculty of Pharmacy, School of Pharmaceutical Sciences, National Yang-Ming University, Taipei 112, Taiwan

<sup>6</sup> Department of Medical Research, China Medical University Hospital, China Medical University, Taichung 404, Taiwan

\* Correspondence: chenjj@ym.edu.tw (J.-J.C.); slfu@ym.edu.tw (S.-L.F.)

Tel.: +886-2-2826-7195 (J.-J.C.); +886-2-2826-7177 (S.-L.F.) ; Fax: +886-2-2823-2940 (J.-J.C.); +886-2-2822-5044 (S.-L.F.)

## Contents

|                                                                                                 |     |
|-------------------------------------------------------------------------------------------------|-----|
| <b>Figure S1.</b> HRESIMS spectrum of <b>1</b> .....                                            | S4  |
| <b>Figure S2.</b> <sup>1</sup> H NMR spectrum (CDCl <sub>3</sub> , 500 MHz) of <b>1</b> .....   | S4  |
| <b>Figure S3.</b> <sup>13</sup> C NMR spectrum (CDCl <sub>3</sub> , 125 MHz) of <b>1</b> .....  | S5  |
| <b>Figure S4.</b> <sup>1</sup> H- <sup>1</sup> H COSY spectrum of <b>1</b> .....                | S5  |
| <b>Figure S5.</b> Expanded <sup>1</sup> H- <sup>1</sup> H COSY spectrum of <b>1</b> .....       | S6  |
| <b>Figure S6.</b> ROESY spectrum of <b>1</b> .....                                              | S6  |
| <b>Figure S7.</b> Expanded ROESY spectrum of <b>1</b> .....                                     | S7  |
| <b>Figure S8.</b> HMBC spectrum of <b>1</b> .....                                               | S7  |
| <b>Figure S9.</b> HSQC spectrum of <b>1</b> .....                                               | S8  |
| <b>Figure S10.</b> CD spectrum of <b>1</b> .....                                                | S8  |
| <b>Figure S11.</b> HRESIMS spectrum of <b>2</b> .....                                           | S9  |
| <b>Figure S12.</b> <sup>1</sup> H NMR spectrum (CDCl <sub>3</sub> , 500 MHz) of <b>2</b> .....  | S9  |
| <b>Figure S13.</b> <sup>13</sup> C NMR spectrum (CDCl <sub>3</sub> , 125 MHz) of <b>2</b> ..... | S10 |
| <b>Figure S14.</b> <sup>1</sup> H- <sup>1</sup> H COSY spectrum of <b>2</b> .....               | S10 |
| <b>Figure S15.</b> Expanded <sup>1</sup> H- <sup>1</sup> H COSY spectrum of <b>2</b> .....      | S11 |
| <b>Figure S16.</b> ROESY spectrum of <b>2</b> .....                                             | S11 |
| <b>Figure S17.</b> Expanded ROESY spectrum of <b>2</b> .....                                    | S12 |
| <b>Figure S18.</b> HMBC spectrum of <b>2</b> .....                                              | S12 |
| <b>Figure S19.</b> HSQC spectrum of <b>2</b> .....                                              | S13 |
| <b>Figure S20.</b> CD spectrum of <b>2</b> .....                                                | S13 |
| <b>Figure S21.</b> HRESIMS spectrum of <b>3</b> .....                                           | S14 |
| <b>Figure S22.</b> <sup>1</sup> H NMR spectrum (CDCl <sub>3</sub> , 500 MHz) of <b>3</b> .....  | S14 |
| <b>Figure S23.</b> <sup>13</sup> C NMR spectrum (CDCl <sub>3</sub> , 125 MHz) of <b>3</b> ..... | S15 |
| <b>Figure S24.</b> <sup>1</sup> H- <sup>1</sup> H COSY spectrum of <b>3</b> .....               | S15 |
| <b>Figure S25.</b> Expanded <sup>1</sup> H- <sup>1</sup> H COSY spectrum of <b>3</b> .....      | S16 |
| <b>Figure S26.</b> ROESY spectrum of <b>3</b> .....                                             | S16 |
| <b>Figure S27.</b> Expanded ROESY spectrum of <b>3</b> .....                                    | S17 |

|                                                                                                 |     |
|-------------------------------------------------------------------------------------------------|-----|
| <b>Figure S28.</b> HMBC spectrum of <b>3</b> .....                                              | S17 |
| <b>Figure S29.</b> HSQC spectrum of <b>3</b> .....                                              | S18 |
| <b>Figure S30.</b> CD spectrum of <b>3</b> .....                                                | S18 |
| <b>Figure S31.</b> HRESIMS spectrum of <b>4</b> .....                                           | S19 |
| <b>Figure S32.</b> <sup>1</sup> H NMR spectrum (CDCl <sub>3</sub> , 500 MHz) of <b>4</b> .....  | S19 |
| <b>Figure S33.</b> <sup>13</sup> C NMR spectrum (CDCl <sub>3</sub> , 125 MHz) of <b>4</b> ..... | S20 |
| <b>Figure S34.</b> CD spectrum of <b>4</b> .....                                                | S20 |
| <b>Figure S35.</b> HRESIMS spectrum of <b>5</b> .....                                           | S21 |
| <b>Figure S36.</b> <sup>1</sup> H NMR spectrum (CDCl <sub>3</sub> , 600 MHz) of <b>5</b> .....  | S21 |
| <b>Figure S37.</b> HRESIMS spectrum of <b>6</b> .....                                           | S22 |
| <b>Figure S38.</b> <sup>1</sup> H NMR spectrum (CDCl <sub>3</sub> , 600 MHz) of <b>6</b> .....  | S22 |
| <b>Figure S39.</b> HRESIMS spectrum of <b>7</b> .....                                           | S23 |
| <b>Figure S40.</b> <sup>1</sup> H NMR spectrum (CDCl <sub>3</sub> , 600 MHz) of <b>7</b> .....  | S23 |
| <b>Figure S41.</b> CD and ECD spectra of epiremisporine B.....                                  | S24 |
| <b>Table S1.</b> <sup>1</sup> H NMR spectrum of <b>4</b> and epiremisporine B.....              | S24 |
| <b>Table S2.</b> <sup>13</sup> C NMR spectrum of <b>4</b> and epiremisporine B.....             | S25 |
| <b>Table S3.</b> The ROESY correlations for compounds <b>1–3</b> .....                          | S26 |

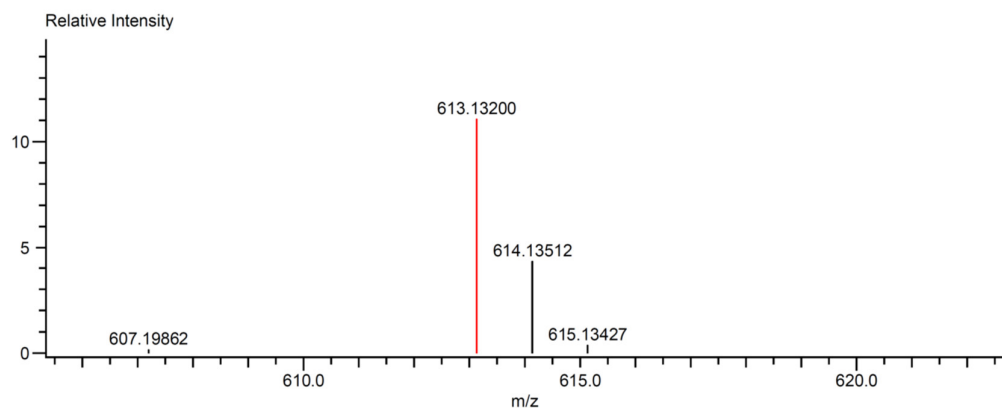

| Mass      | Intensity | Calc. Mass | Mass Difference [mDa] | Mass Difference [ppm] | Possible Formula                                                    |
|-----------|-----------|------------|-----------------------|-----------------------|---------------------------------------------------------------------|
| 613.13200 | 5276.54   | 613.13219  | -0.20                 | -0.32                 | $^{12}\text{C}_{31}\text{H}_{26}^{23}\text{Na}_1^{16}\text{O}_{12}$ |

Figure S1. HRESIMS spectrum of 1.

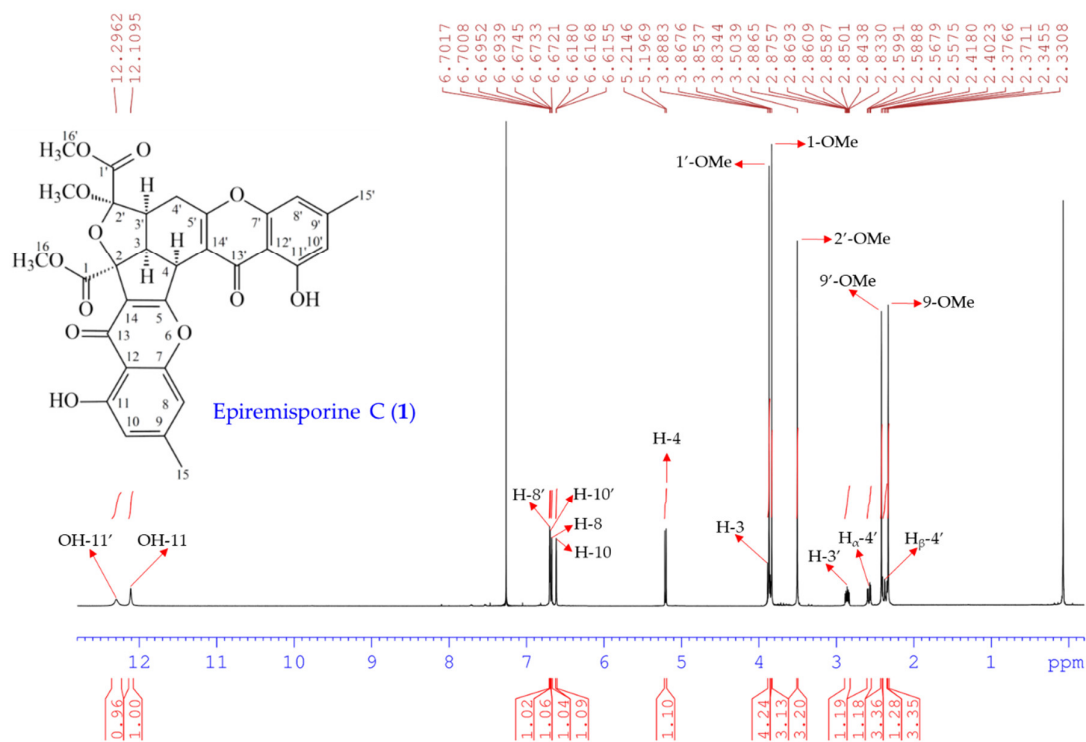

Figure S2.  $^1\text{H}$  NMR spectrum ( $\text{CDCl}_3$ , 500 MHz) of 1.

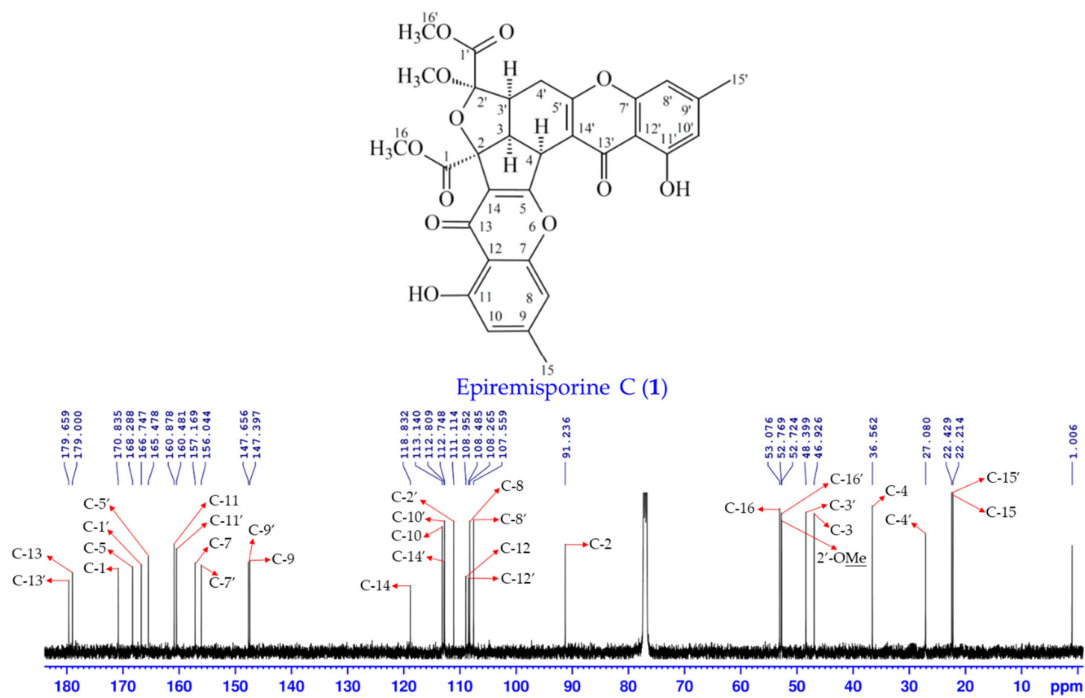

Figure S3.  $^{13}\text{C}$  NMR (CDCl<sub>3</sub>, 125 MHz) spectrum of 1.

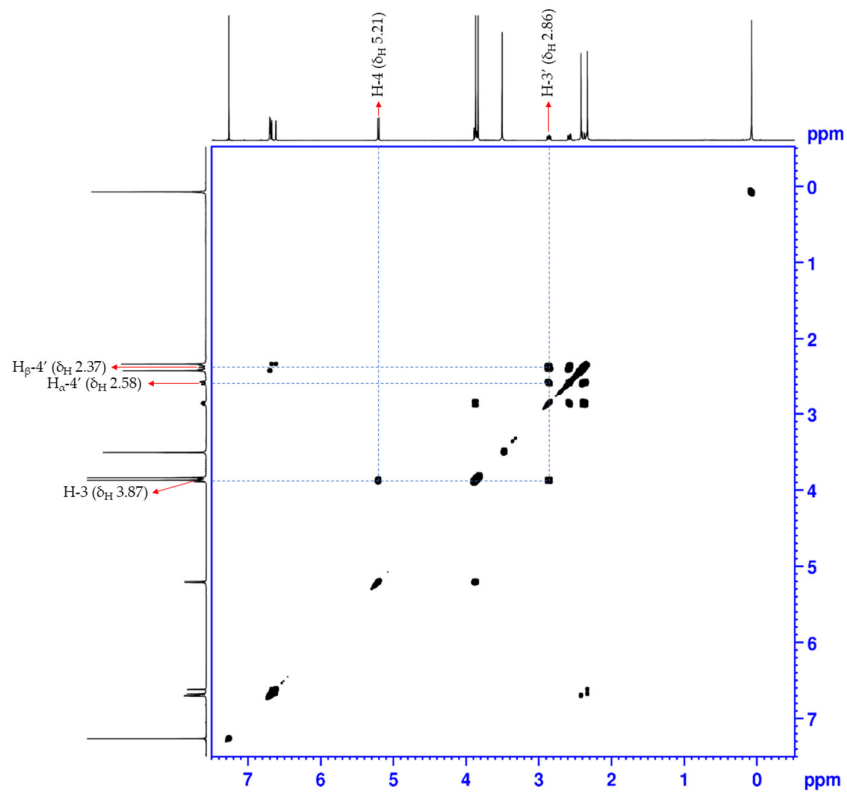

Figure S4.  $^1\text{H}$ - $^1\text{H}$  COSY spectrum of 1.

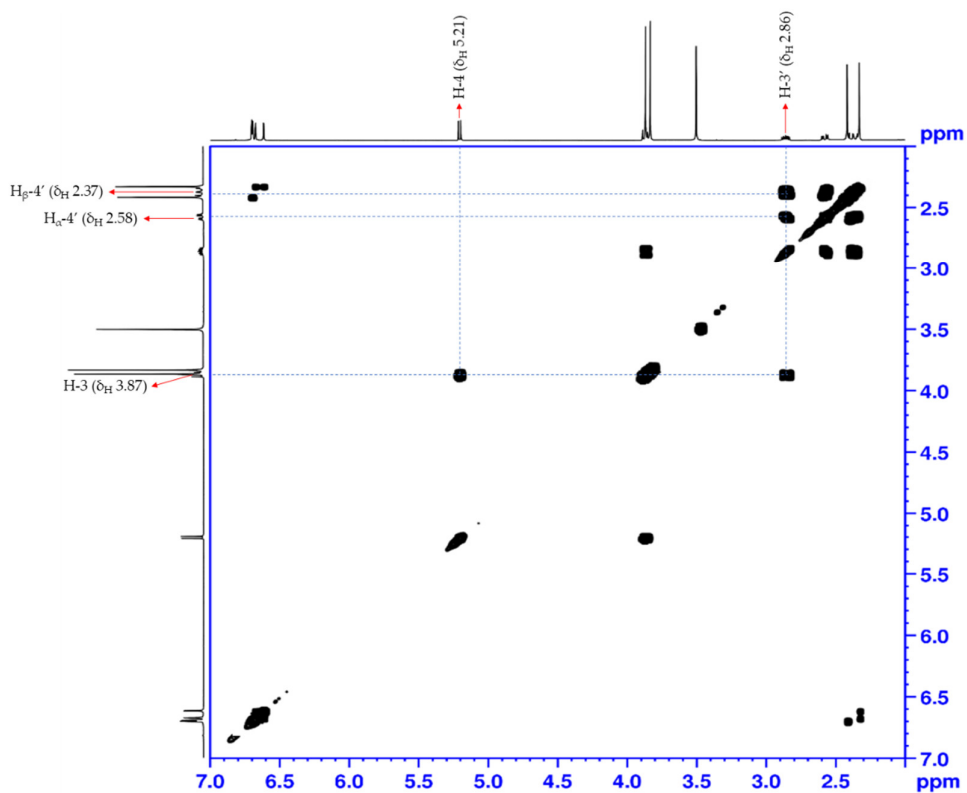

Figure S5. Expanded  $^1\text{H}$ - $^1\text{H}$  COSY spectrum of 1.

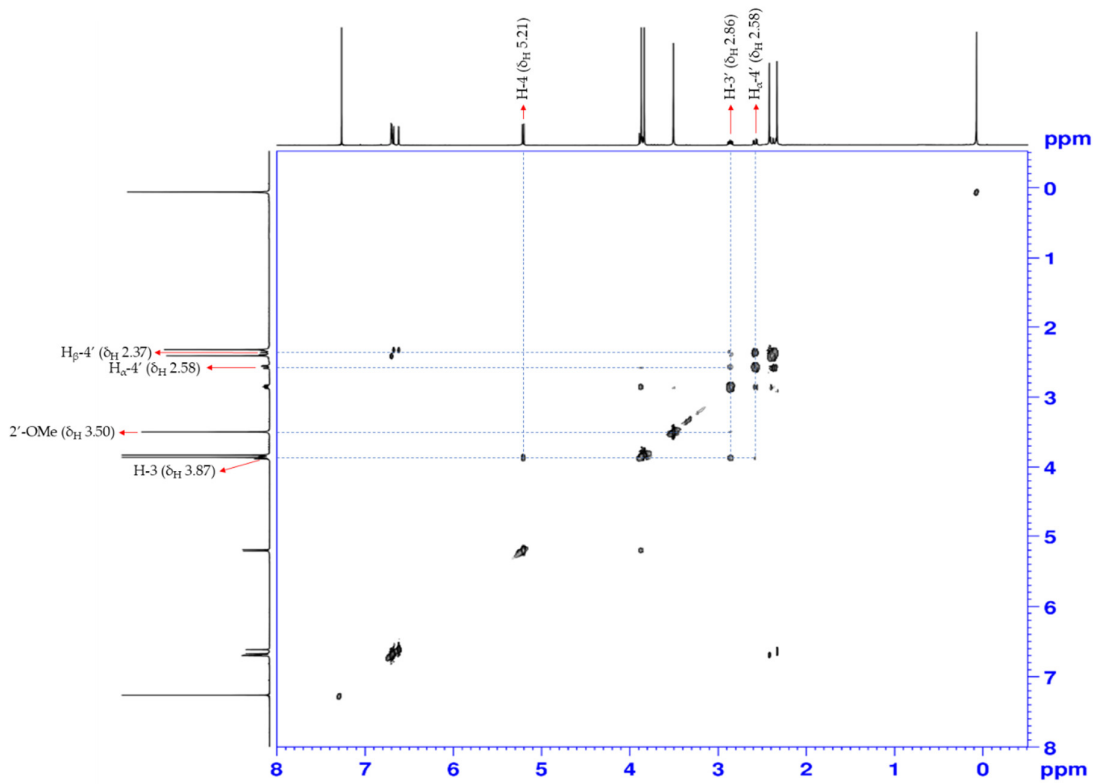

Figure S6. ROESY spectrum of 1.

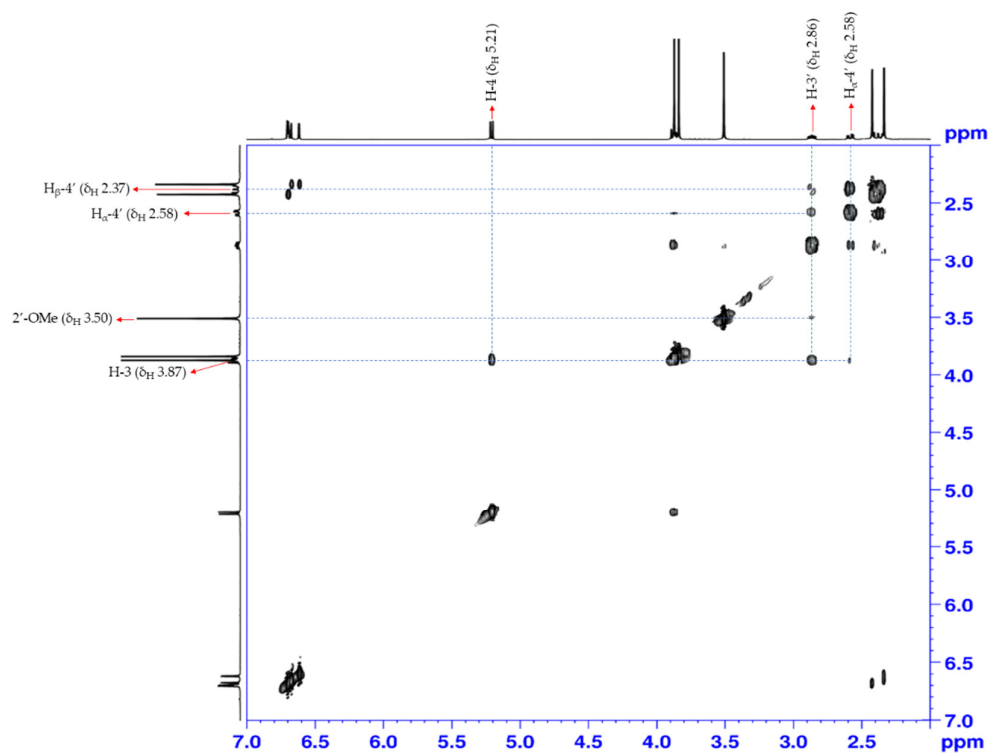

Figure S7. Expanded ROESY spectrum of 1.

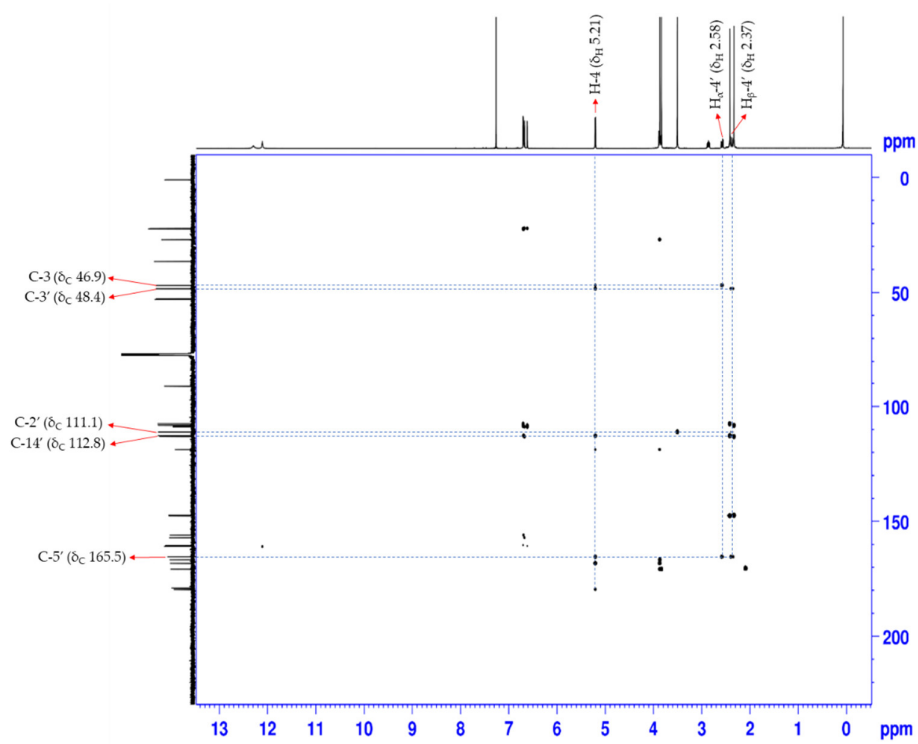

Figure S8. HMBC spectrum of 1.

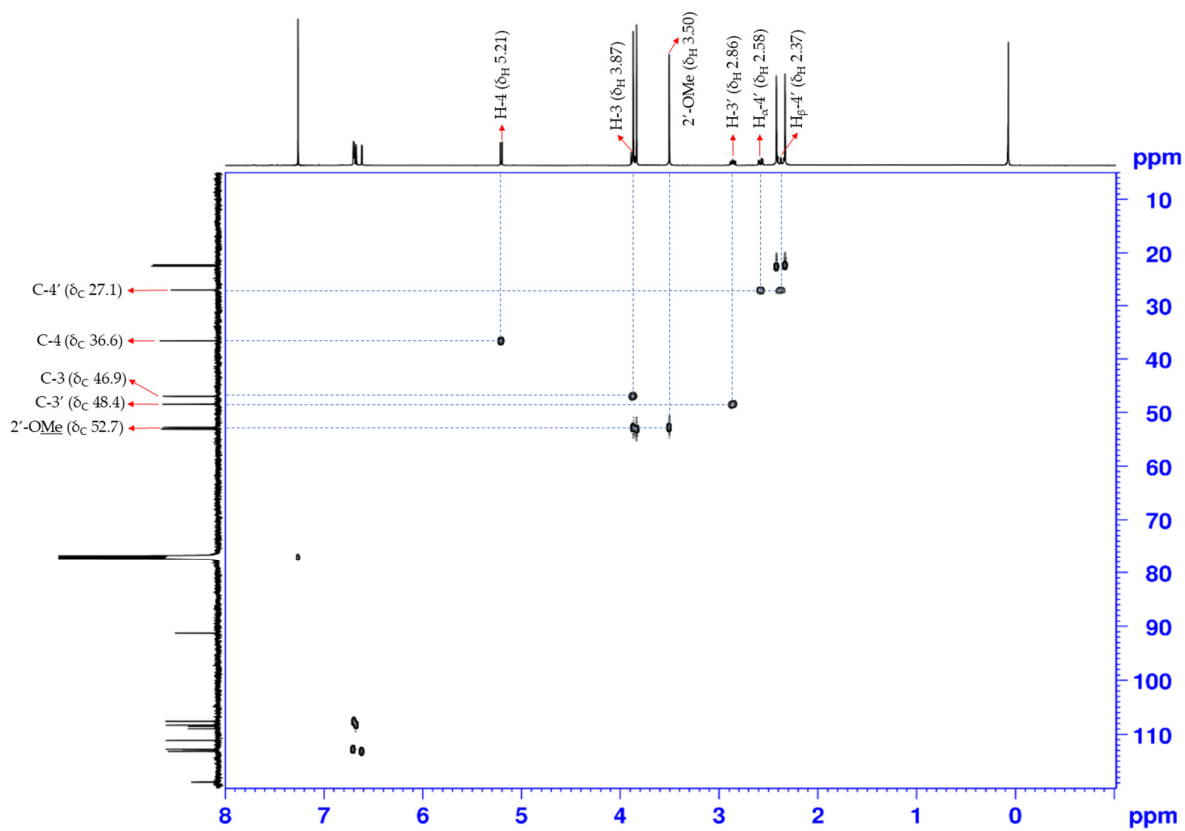

Figure S9. HSQC spectrum of 1.

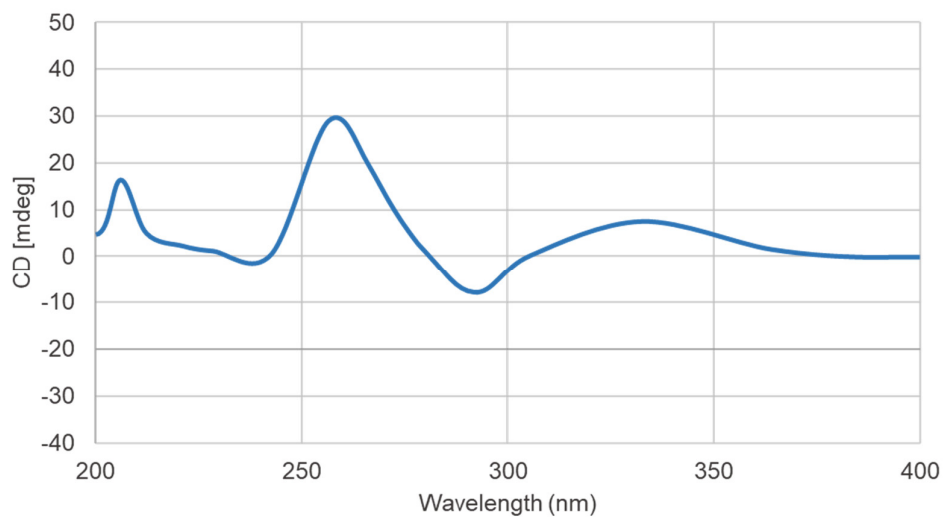

Figure S10. CD spectrum of 1.



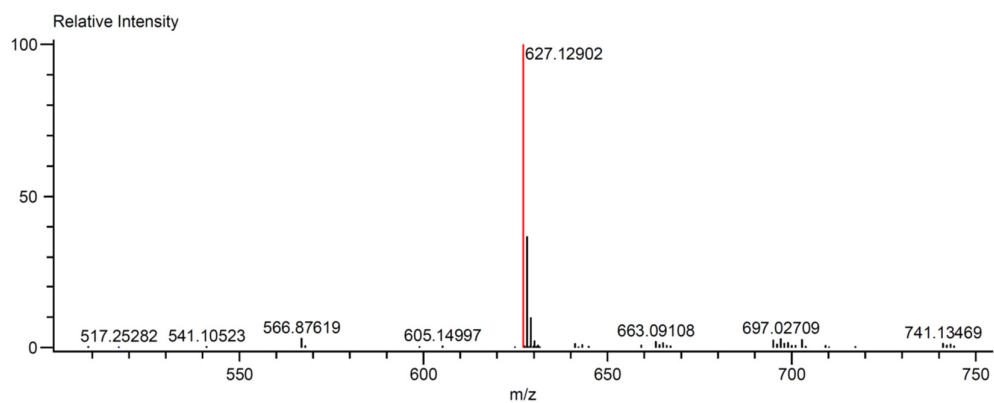

| Mass      | Intensity | Calc. Mass | Mass Difference [mDa] | Mass Difference [ppm] | Possible Formula                                                    |
|-----------|-----------|------------|-----------------------|-----------------------|---------------------------------------------------------------------|
| 627.12902 | 103212.93 | 627.14784  | -18.83                | -30.02                | $^{12}\text{C}_{32}\text{H}_{26}^{23}\text{Na}_1^{16}\text{O}_{12}$ |

Figure S11. HRESIMS spectrum of 2.

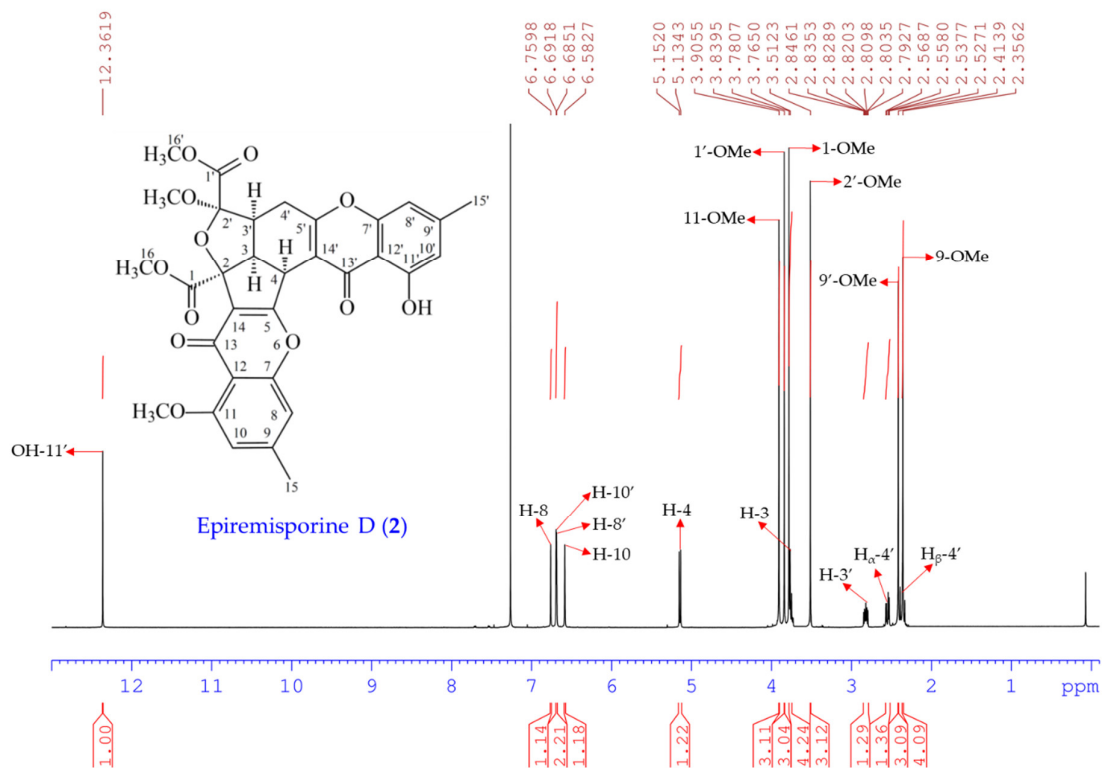

Figure S12.  $^1\text{H}$  NMR spectrum ( $\text{CDCl}_3$ , 500 MHz) of 2.

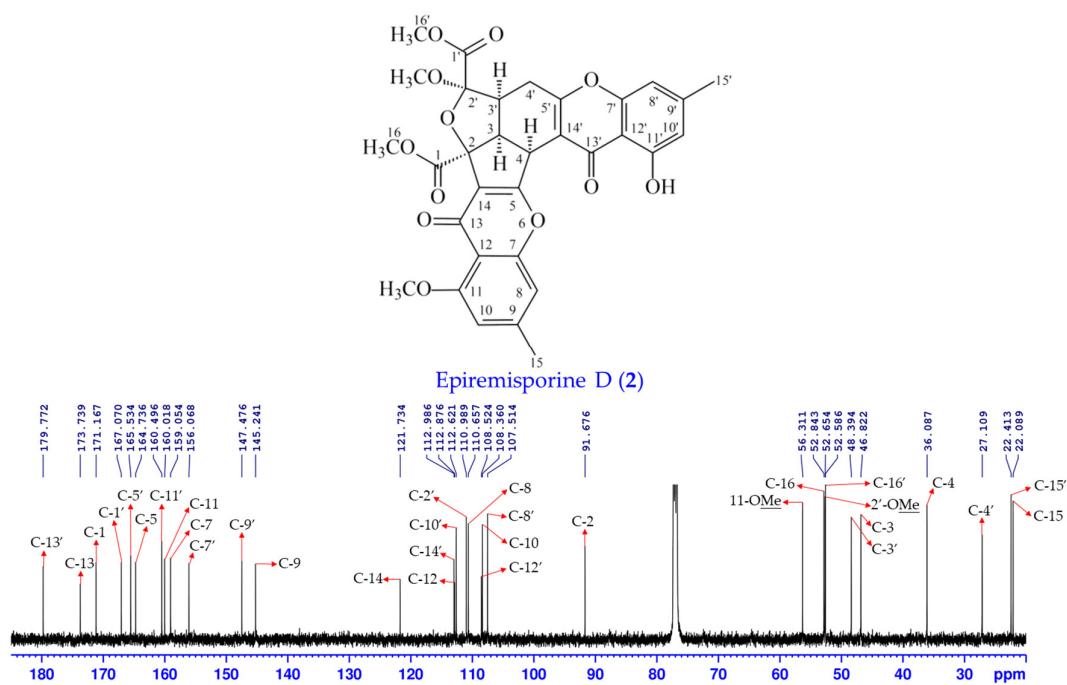

Figure S13.  $^{13}\text{C}$  NMR spectrum ( $\text{CDCl}_3$ , 125 MHz) of 2.

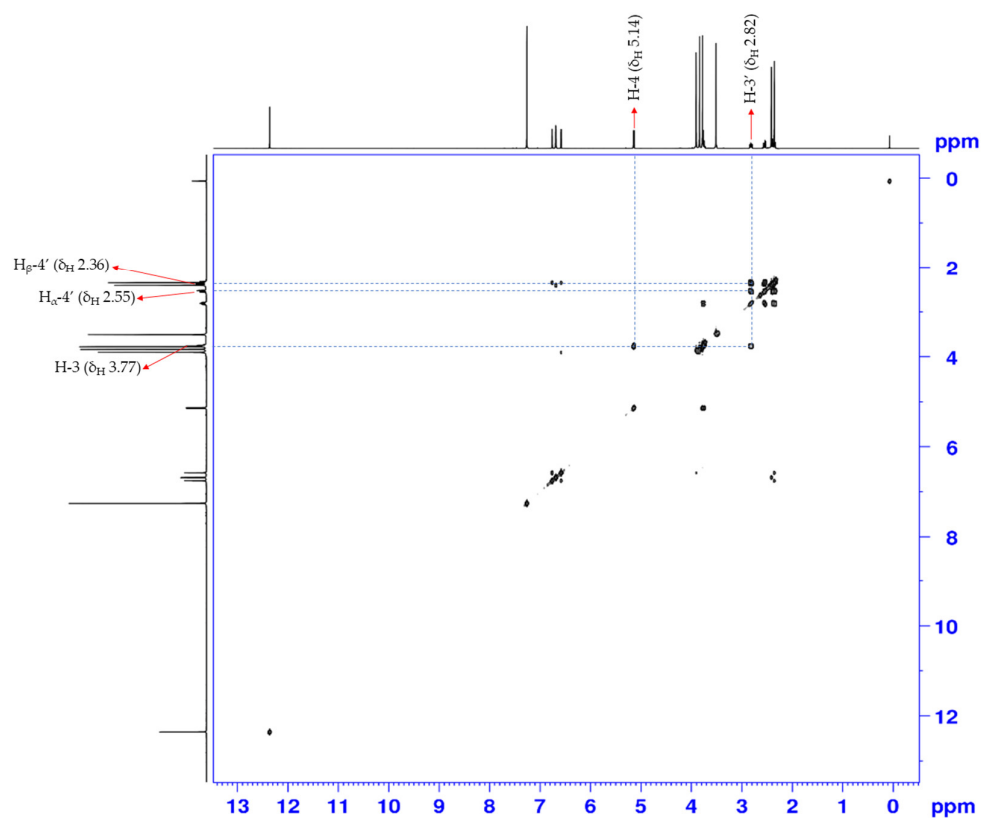

Figure S14.  $^1\text{H}$ - $^1\text{H}$  COSY spectrum of 2.

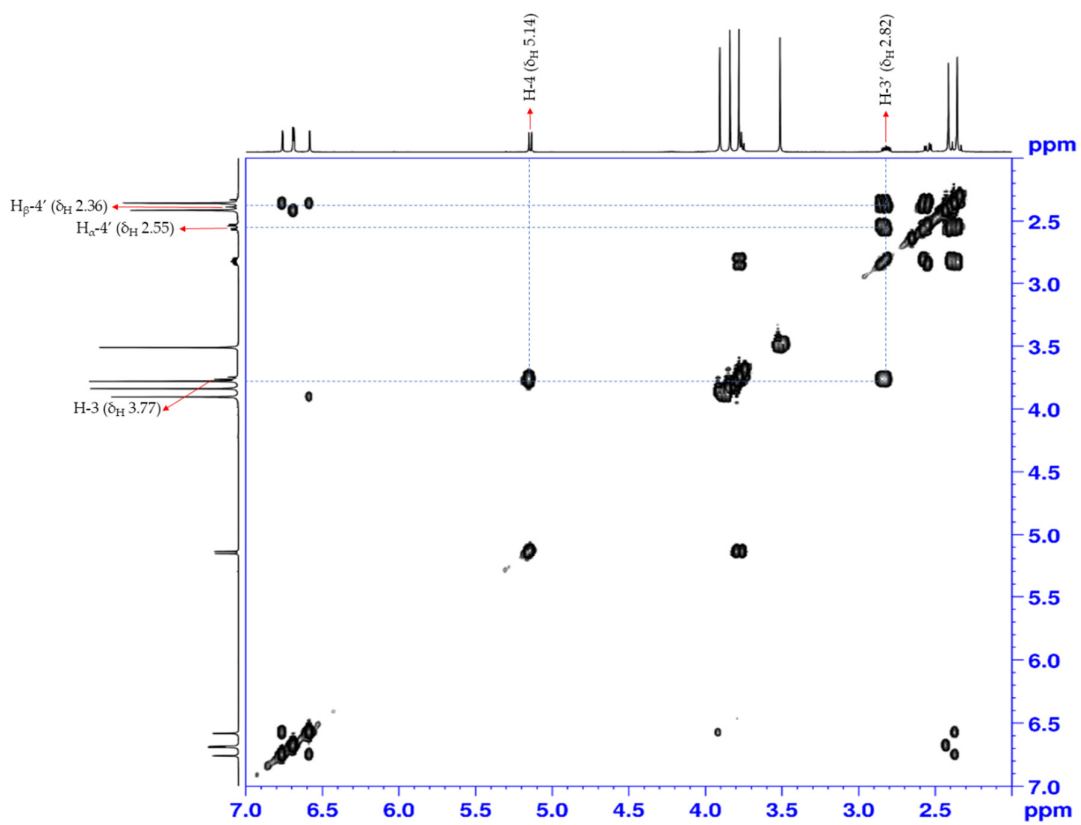

Figure S15. Expanded  $^1\text{H}$ - $^1\text{H}$  COSY spectrum of **2**.

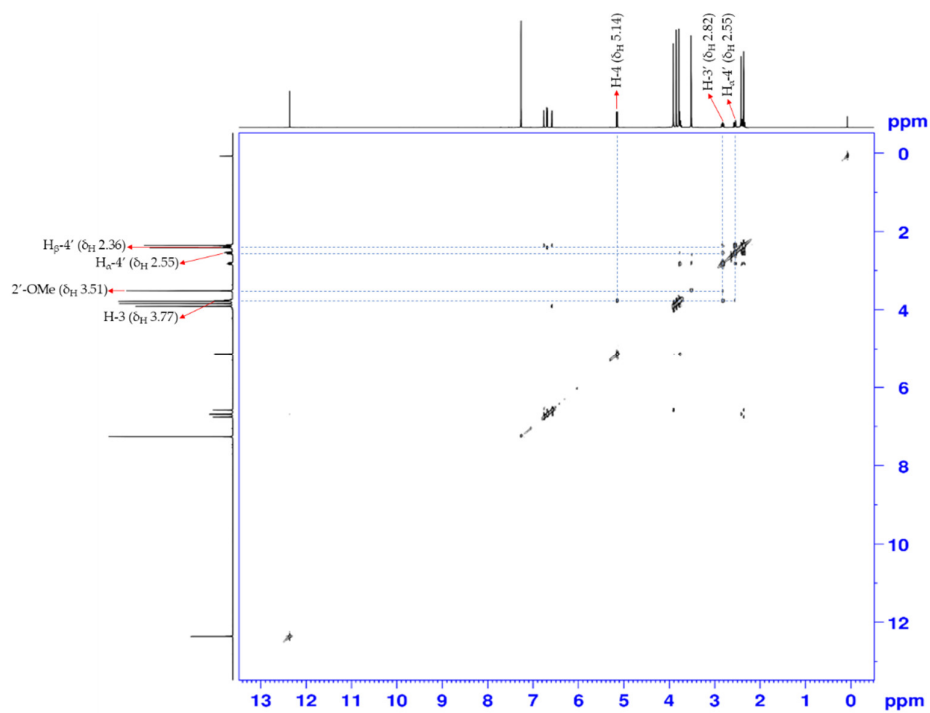

Figure S16. ROESY spectrum of **2**.

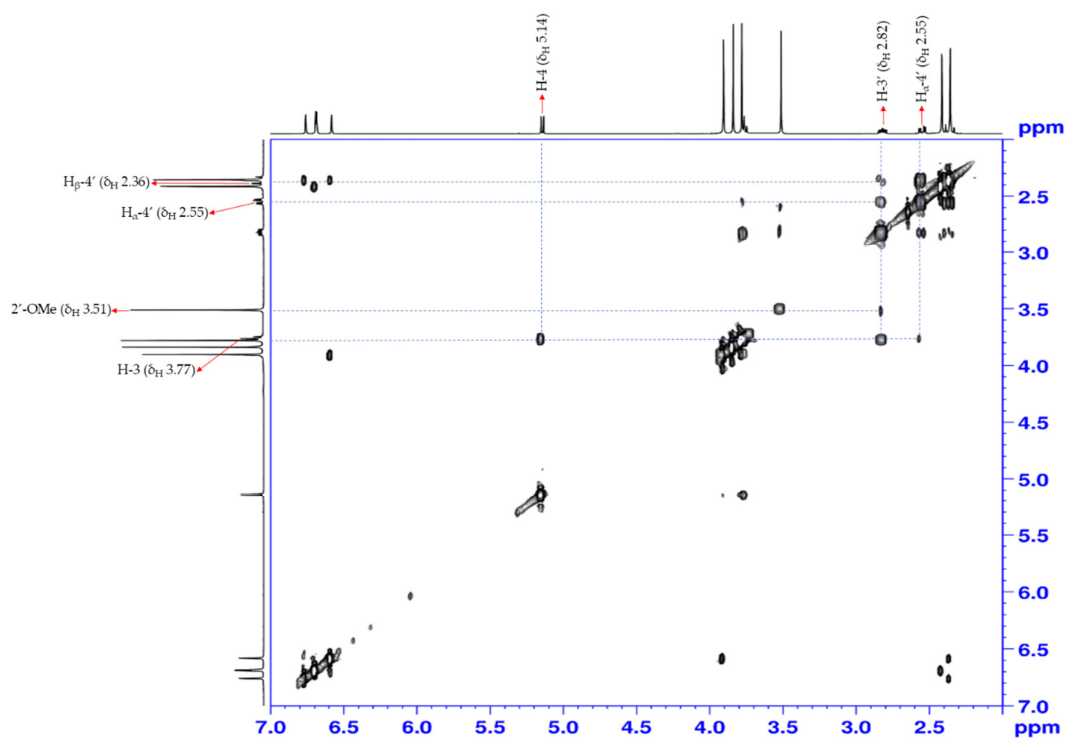

Figure S17. Expanded ROESY spectrum of 2.

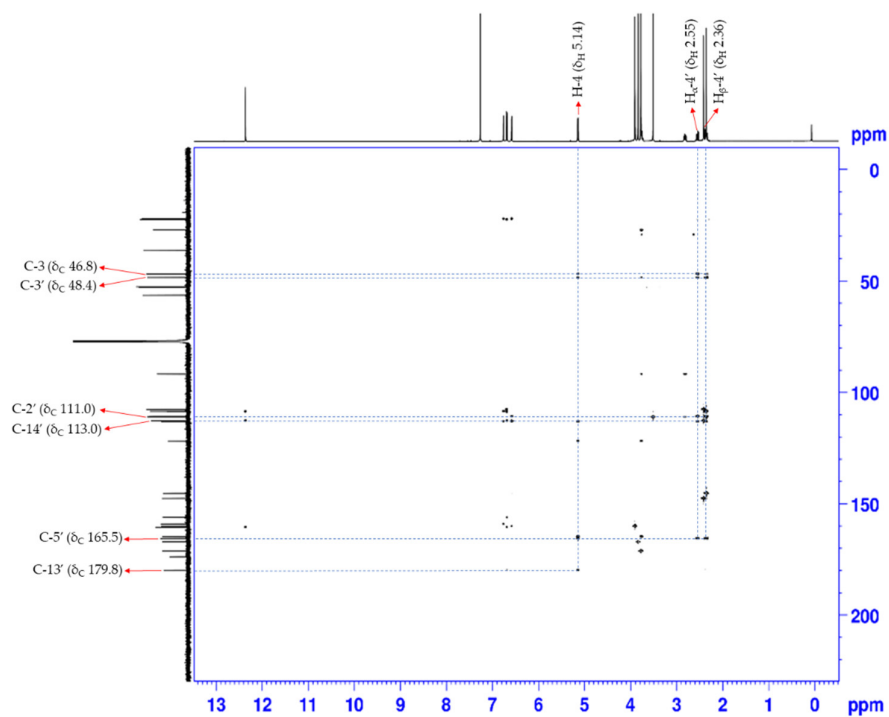

Figure S18. HMBC spectrum of 2.

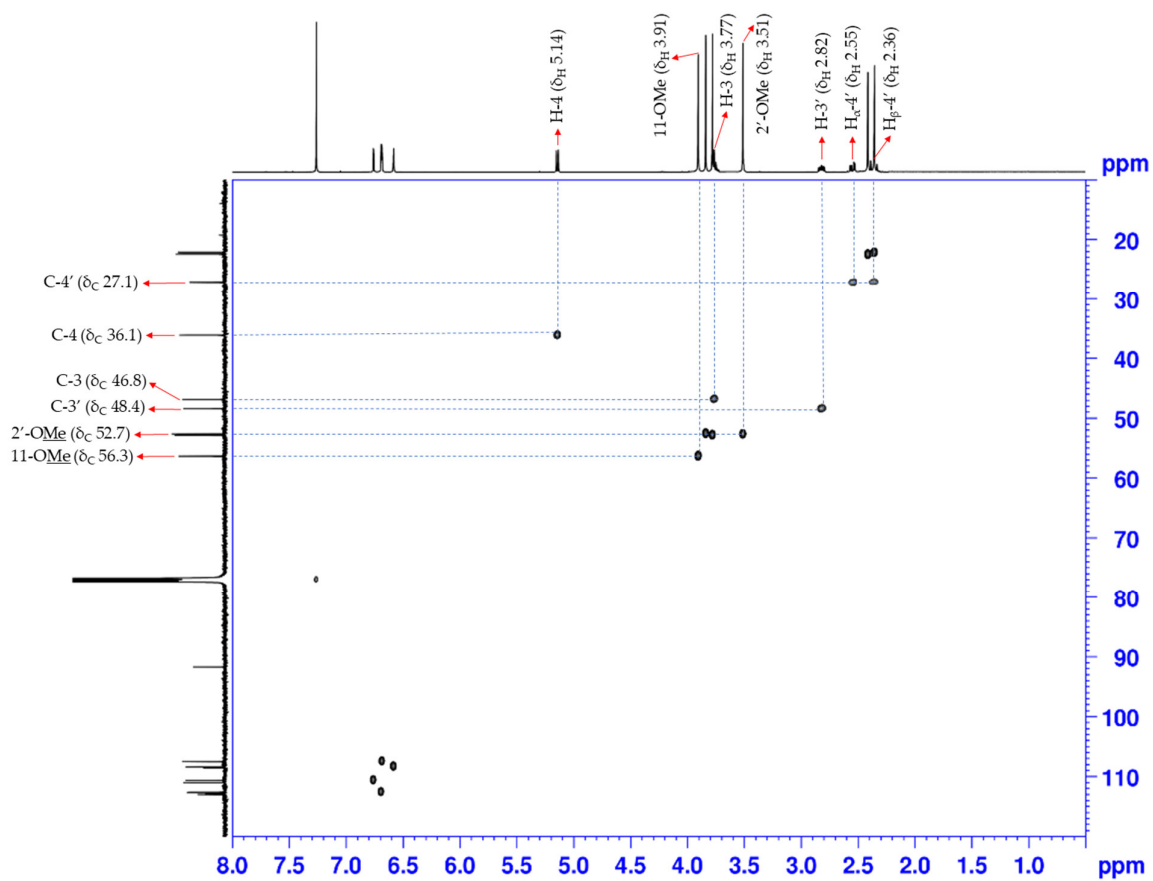

Figure S19. HSQC spectrum of 2.

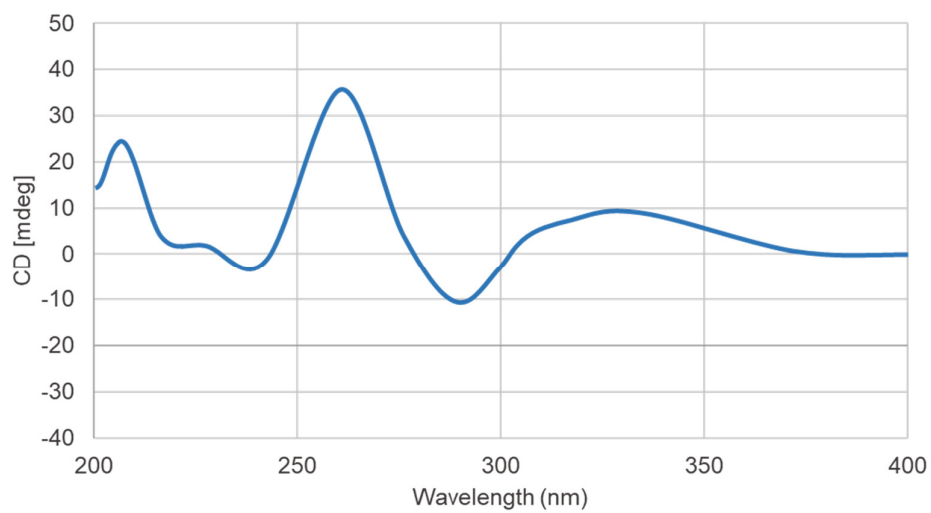

Figure S20. CD spectrum of 2.

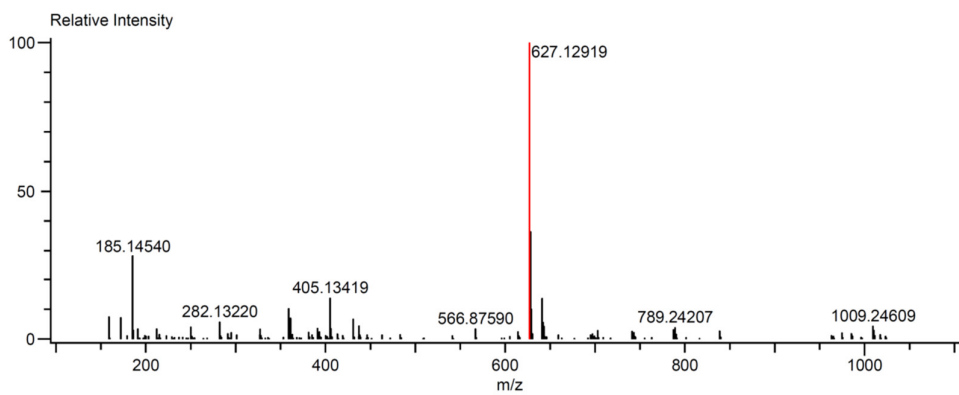

| Mass      | Intensity | Calc. Mass | Mass Difference [mDa] | Mass Difference [ppm] | Possible Formula                                                    |
|-----------|-----------|------------|-----------------------|-----------------------|---------------------------------------------------------------------|
| 627.12919 | 35807.43  | 627.14784  | -18.66                | -29.75                | $^{12}\text{C}_{32}\text{H}_{28}^{23}\text{Na}_1^{16}\text{O}_{12}$ |

Figure S21. HRESIMS spectrum of 3.

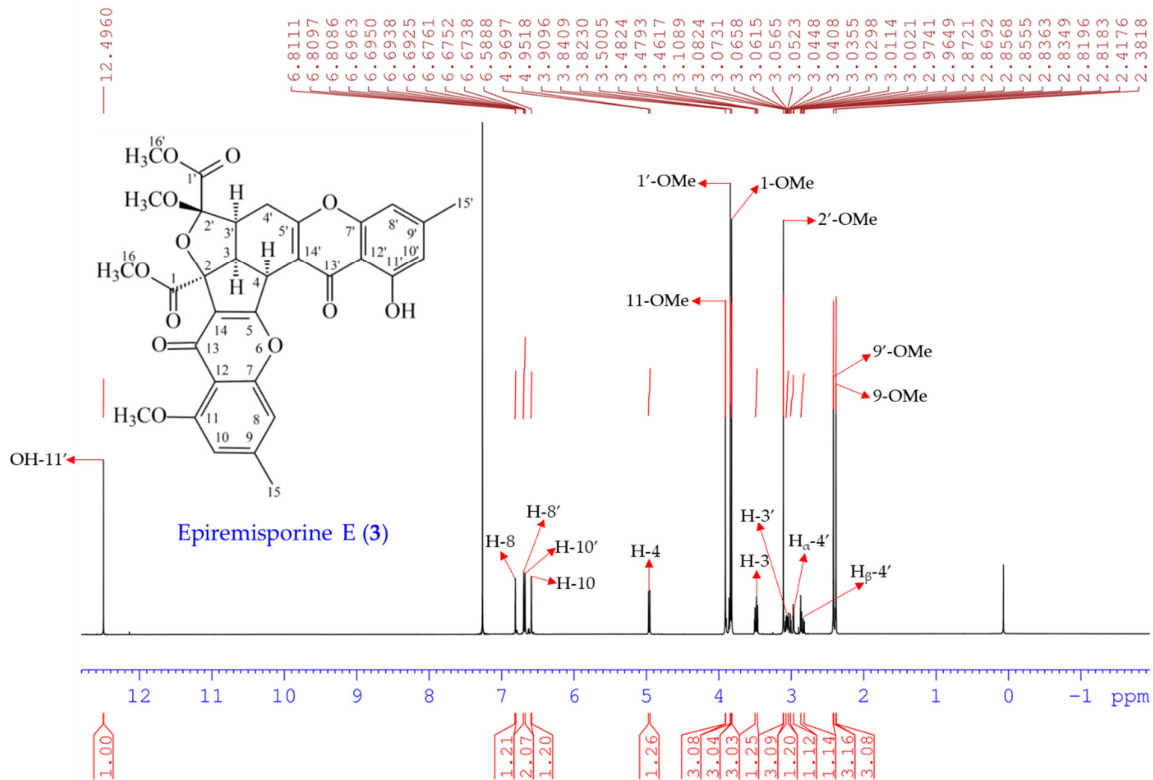

Figure S22.  $^1\text{H}$  NMR spectrum ( $\text{CDCl}_3$ , 500 MHz) of 3.

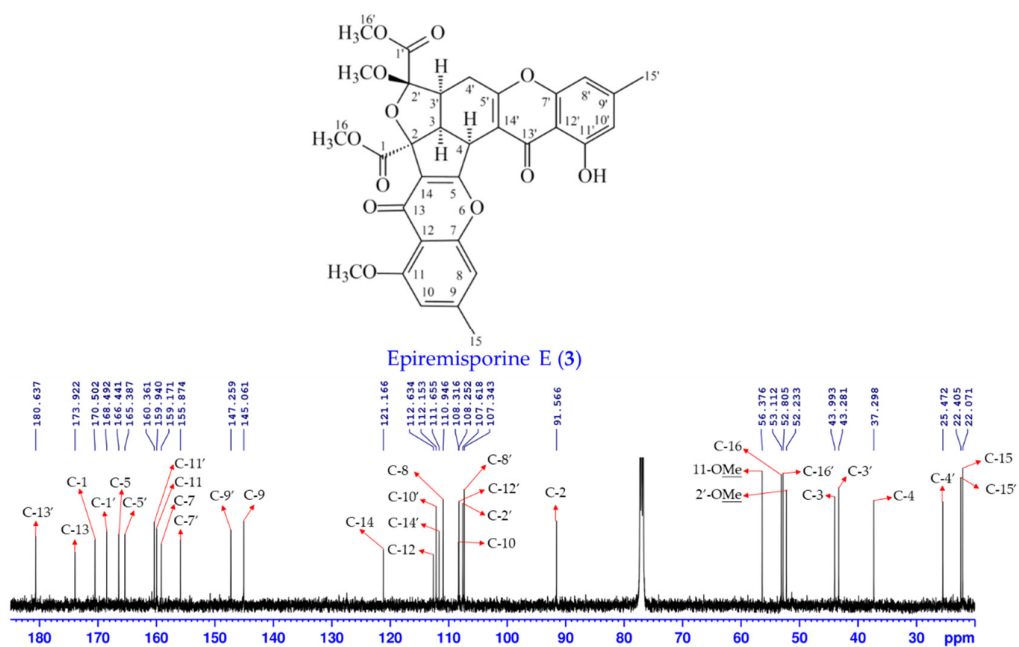

Figure S23. <sup>13</sup>C NMR spectrum of 3 (CDCl<sub>3</sub>, 125 MHz) of 3.

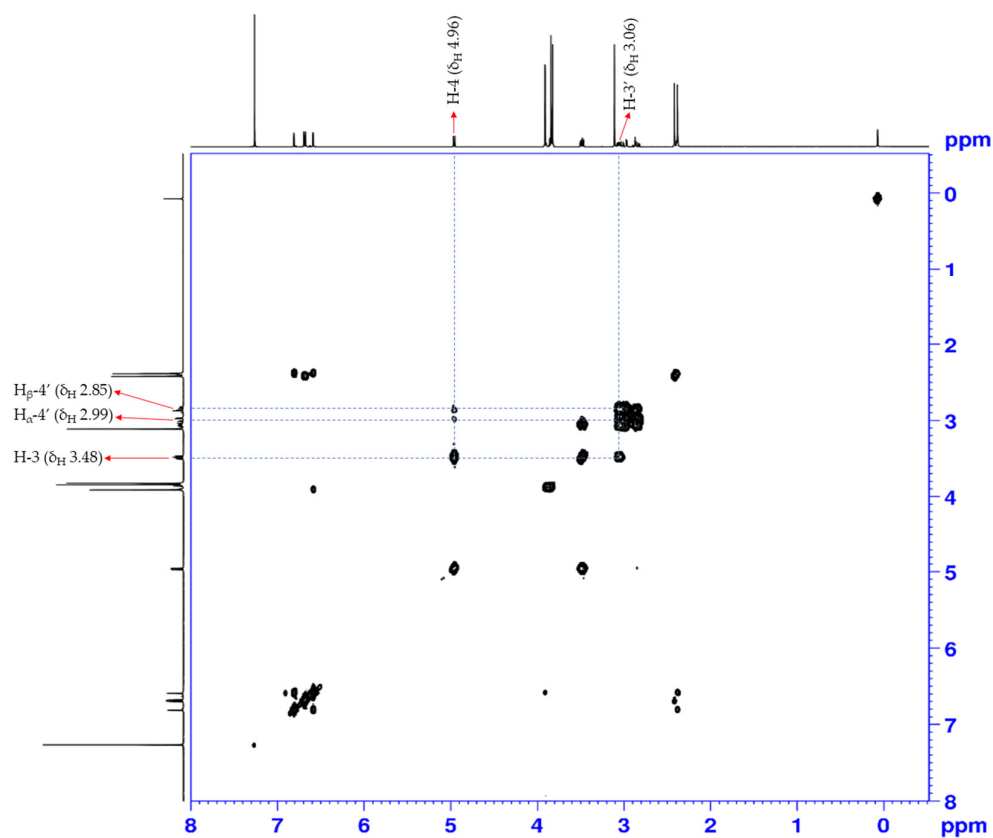

Figure S24. <sup>1</sup>H-<sup>1</sup>H COSY spectrum of 3.

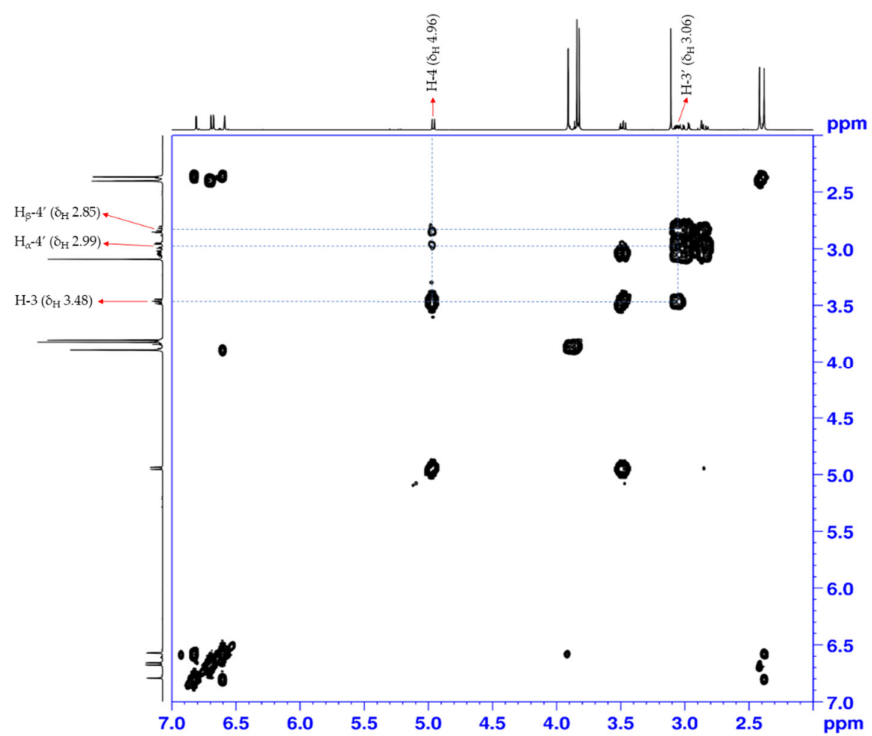

Figure S25. Expanded  $^1\text{H}$ - $^1\text{H}$  COSY spectrum of 3.

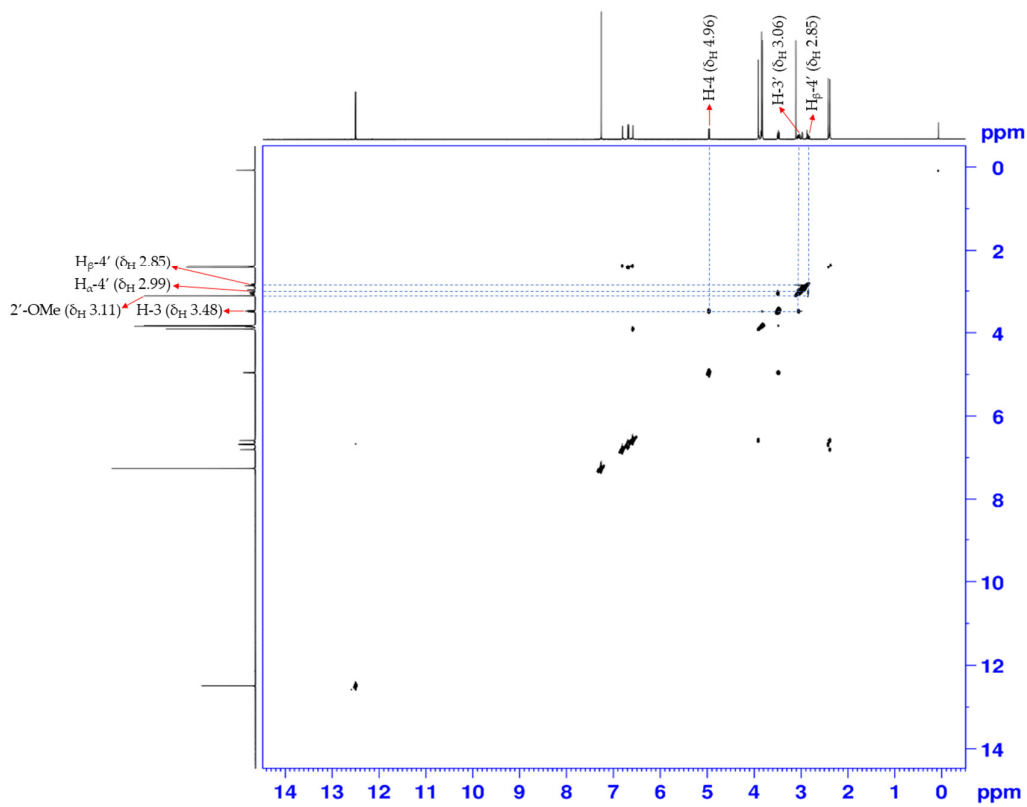

Figure S26. ROESY spectrum of 3.



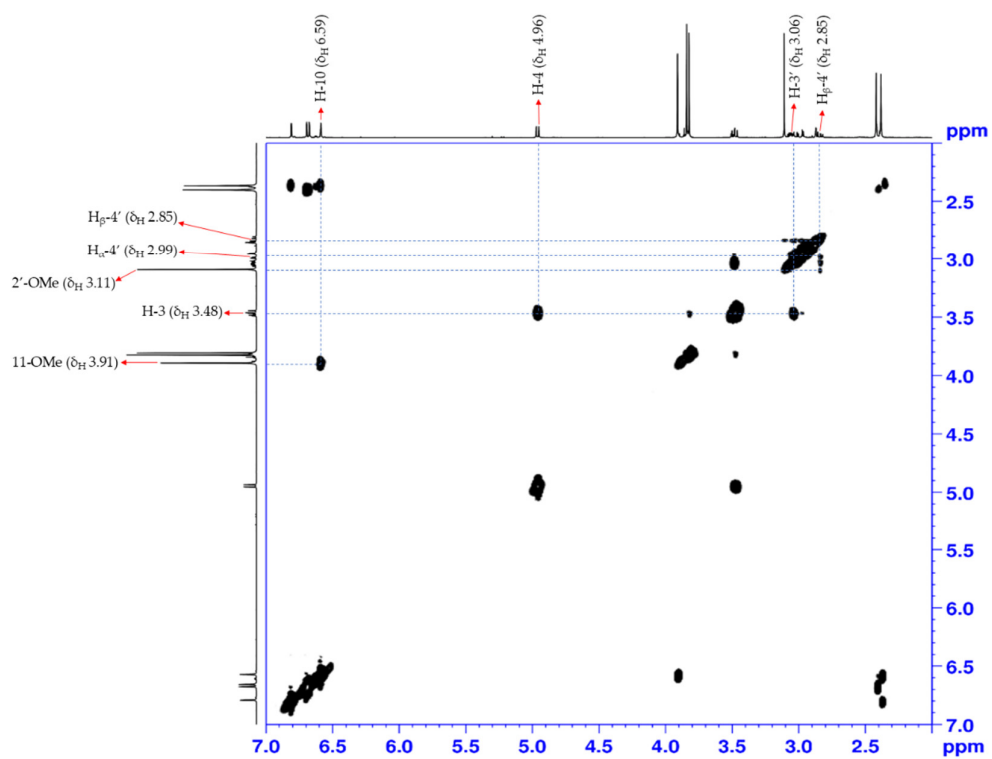

Figure S27. Expanded ROESY spectrum of 3.

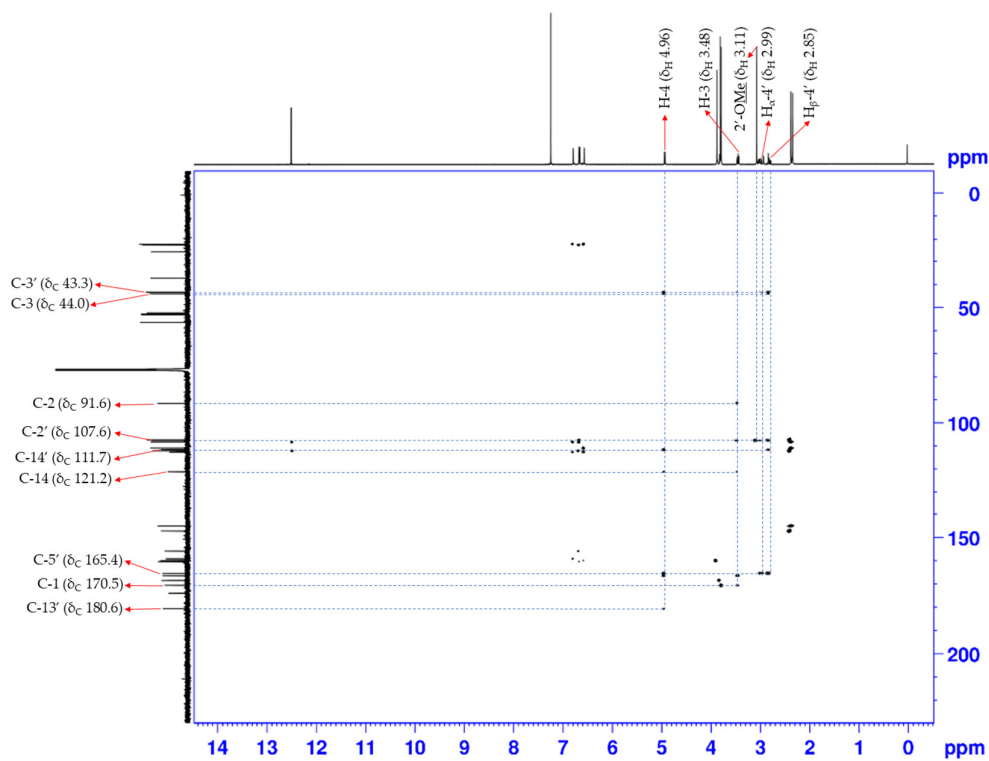

Figure S28. HMBC spectrum of 3.

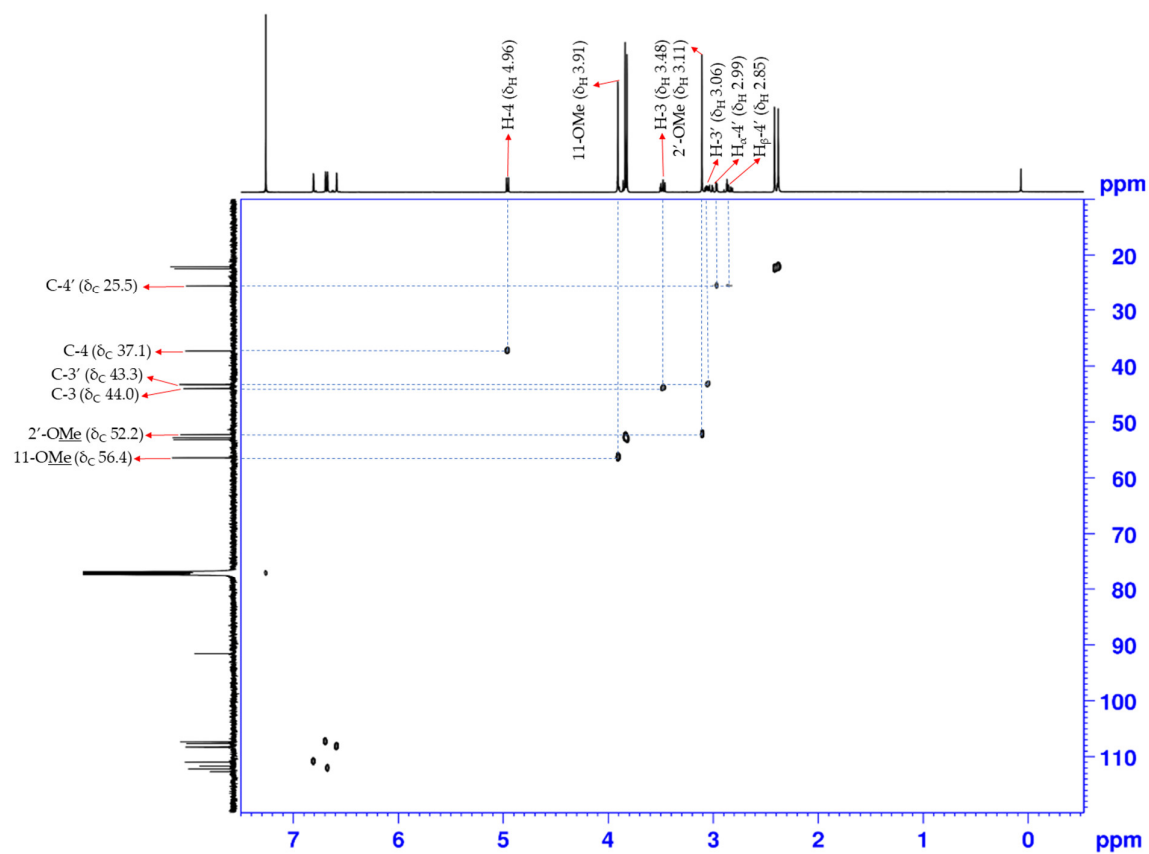

Figure S29. HSQC spectrum of 3.

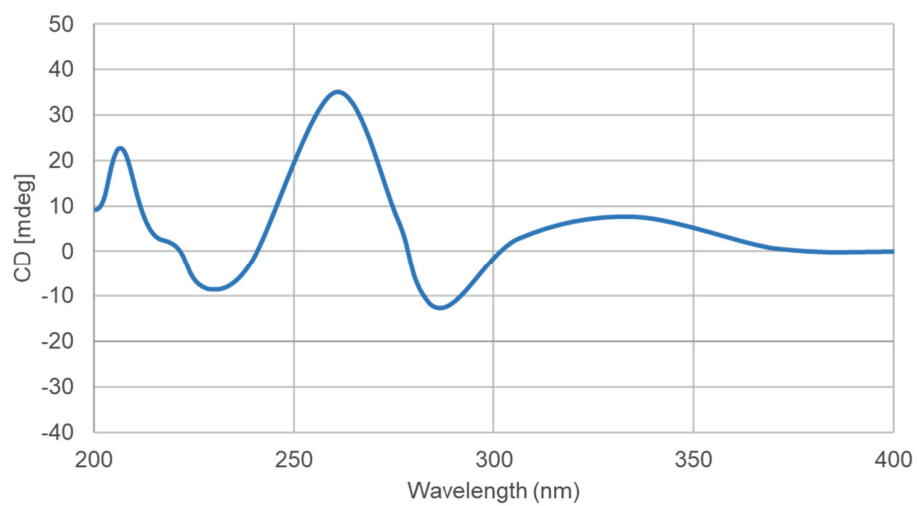

Figure S30. CD spectrum of 3.

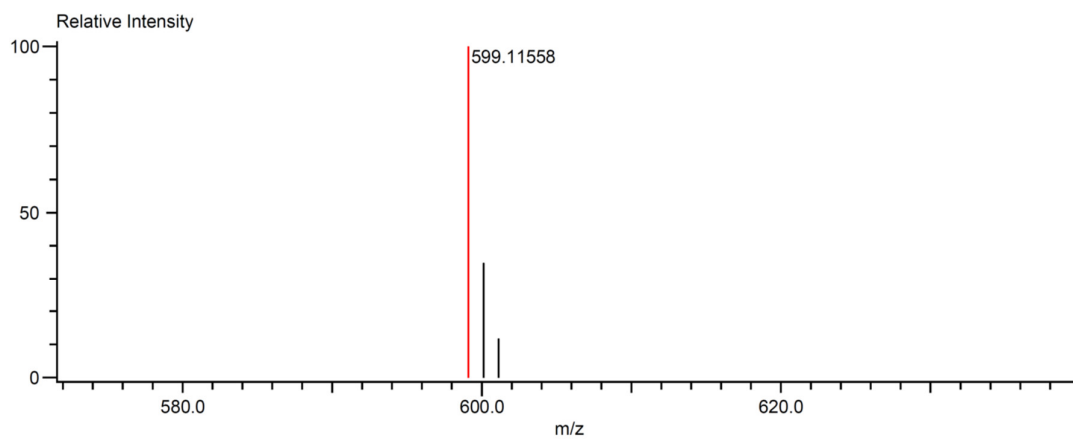

| Mass      | Intensity | Calc. Mass | Mass Difference [mDa] | Mass Difference [ppm] | Possible Formula                                                        |
|-----------|-----------|------------|-----------------------|-----------------------|-------------------------------------------------------------------------|
| 599.11558 | 16867.59  | 599.11654  | -0.96                 | -1.60                 | $^{12}\text{C}_{30}^{1}\text{H}_{24}^{23}\text{Na}_1^{16}\text{O}_{12}$ |

Figure S31. HRESIMS spectrum of 4

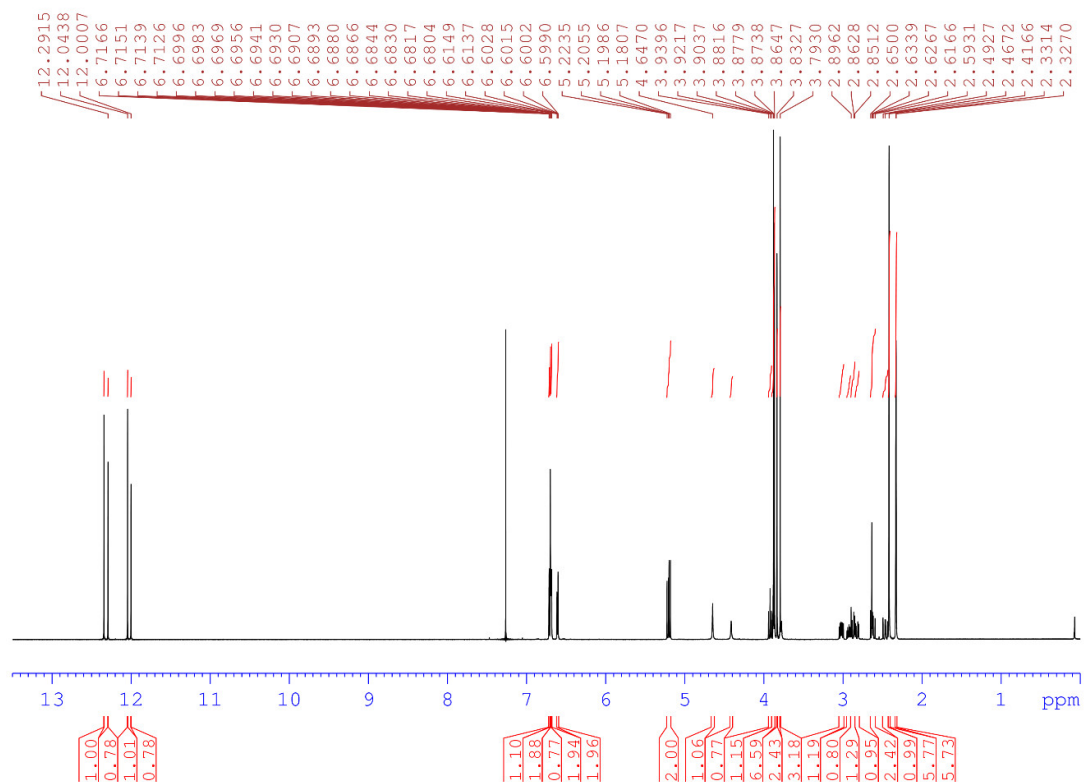

Figure S32.  $^1\text{H}$  NMR spectrum ( $\text{CDCl}_3$ , 500 MHz) of 4.

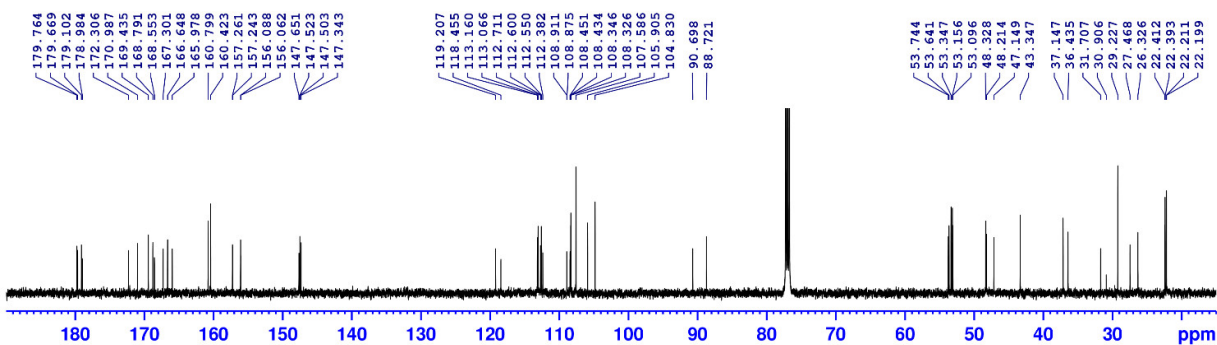

Figure S33.  $^{13}\text{C}$  NMR spectrum ( $\text{CDCl}_3$ , 125 MHz) of 4.

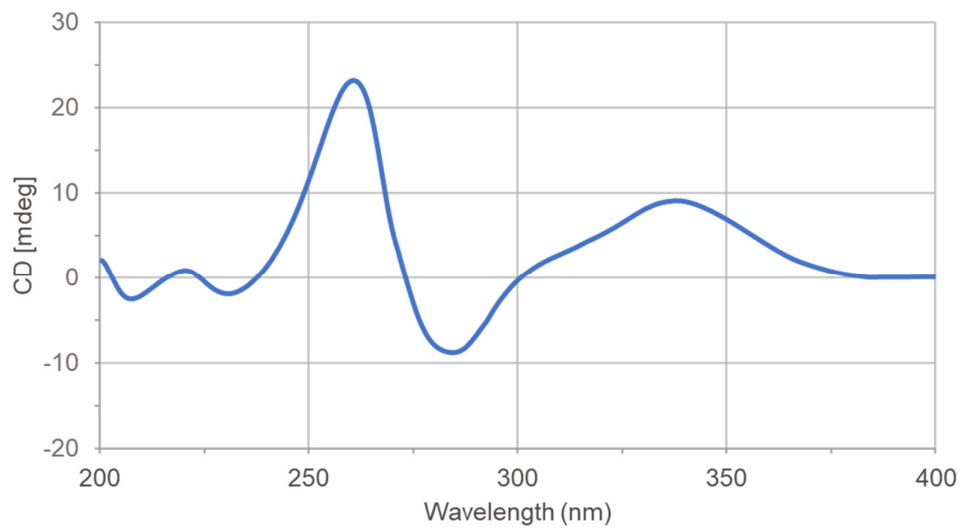

Figure S34. CD spectrum of 4.

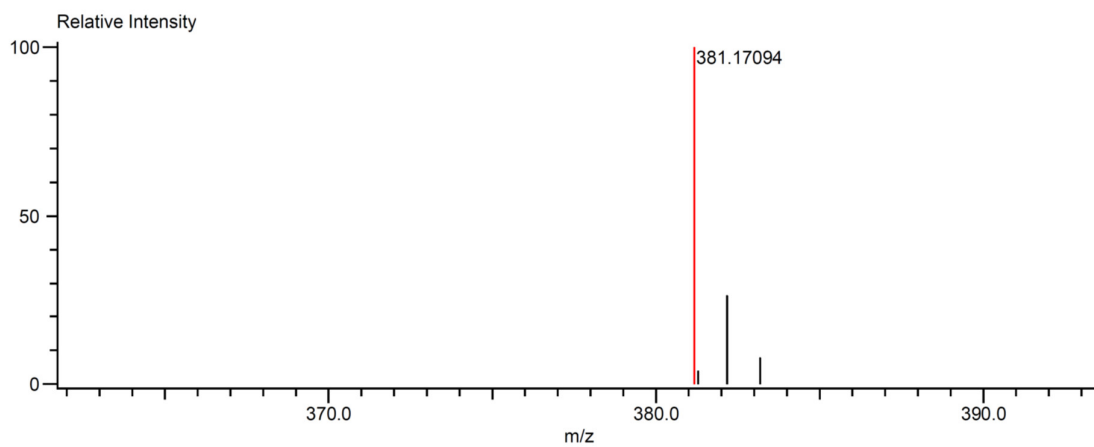

| Mass      | Intensity | Calc. Mass | Mass Difference [mDa] | Mass Difference [ppm] | Possible Formula                            |
|-----------|-----------|------------|-----------------------|-----------------------|---------------------------------------------|
| 381.17094 | 17911.35  | 381.17020  | 0.74                  | 1.94                  | $^{12}\text{C}_{23}\text{H}_{25}\text{O}_5$ |

Figure S35. HRESIMS spectrum of 5.

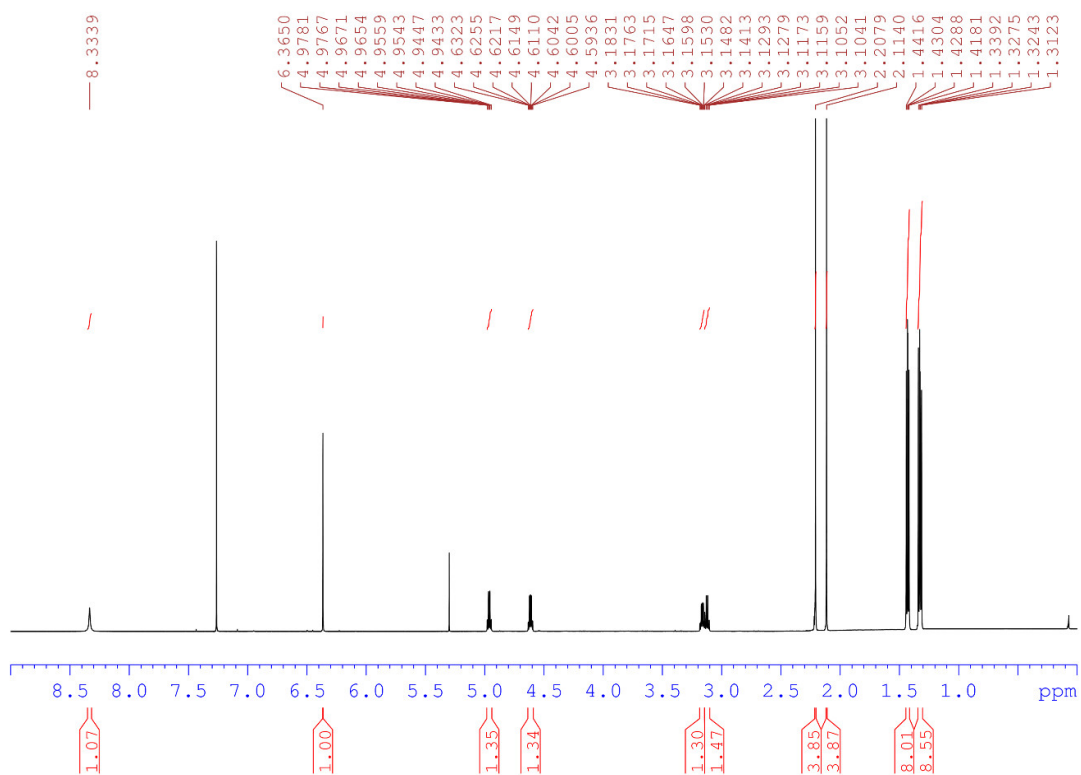

Figure S36.  $^1\text{H}$  NMR spectrum ( $\text{CDCl}_3$ , 600 MHz) of 5.

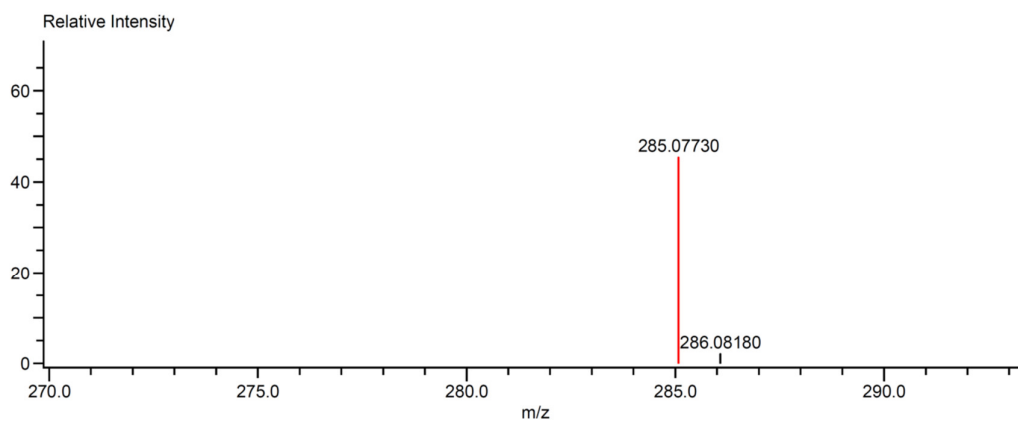

| Mass      | Intensity | Calc. Mass | Mass Difference [mDa] | Mass Difference [ppm] | Possible Formula                                     |
|-----------|-----------|------------|-----------------------|-----------------------|------------------------------------------------------|
| 285.07730 | 2445.10   | 285.07630  | 1.00                  | 3.51                  | $^{12}\text{C}_{16}^{1}\text{H}_{13}^{16}\text{O}_5$ |

Figure S37. HRESIMS spectrum of 6.

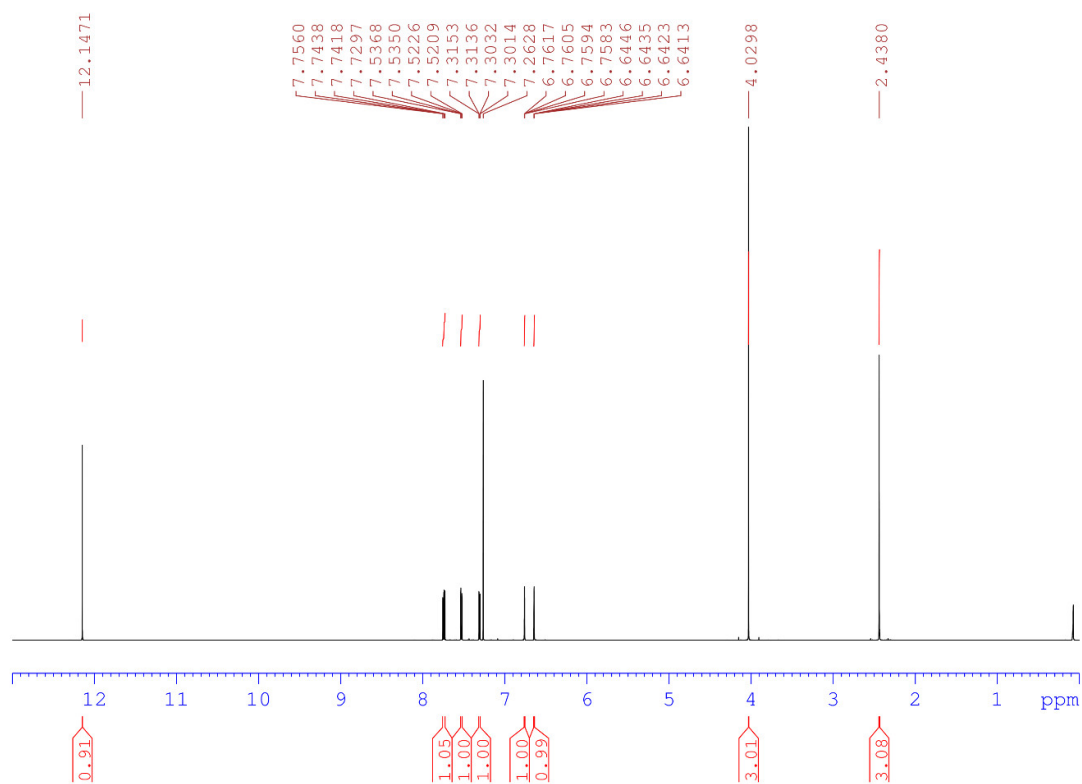

Figure S38.  $^1\text{H}$  NMR spectrum ( $\text{CDCl}_3$ , 600 MHz) of 6.

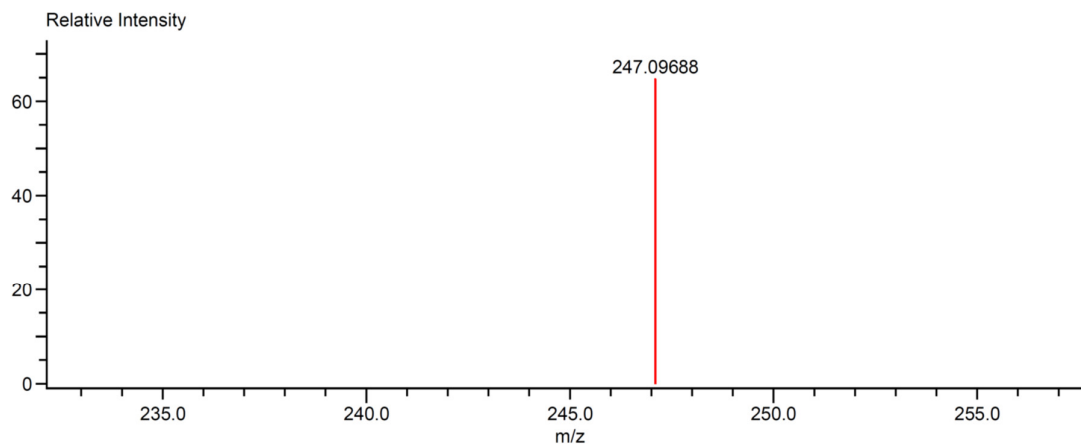

| Mass      | Intensity | Calc. Mass | Mass Difference [mDa] | Mass Difference [ppm] | Possible Formula                                     |
|-----------|-----------|------------|-----------------------|-----------------------|------------------------------------------------------|
| 247.09688 | 2701.97   | 247.09703  | -0.16                 | -0.64                 | $^{12}\text{C}_{14}^{1}\text{H}_{15}^{16}\text{O}_4$ |

Figure S39. HRESIMS spectrum of 7.

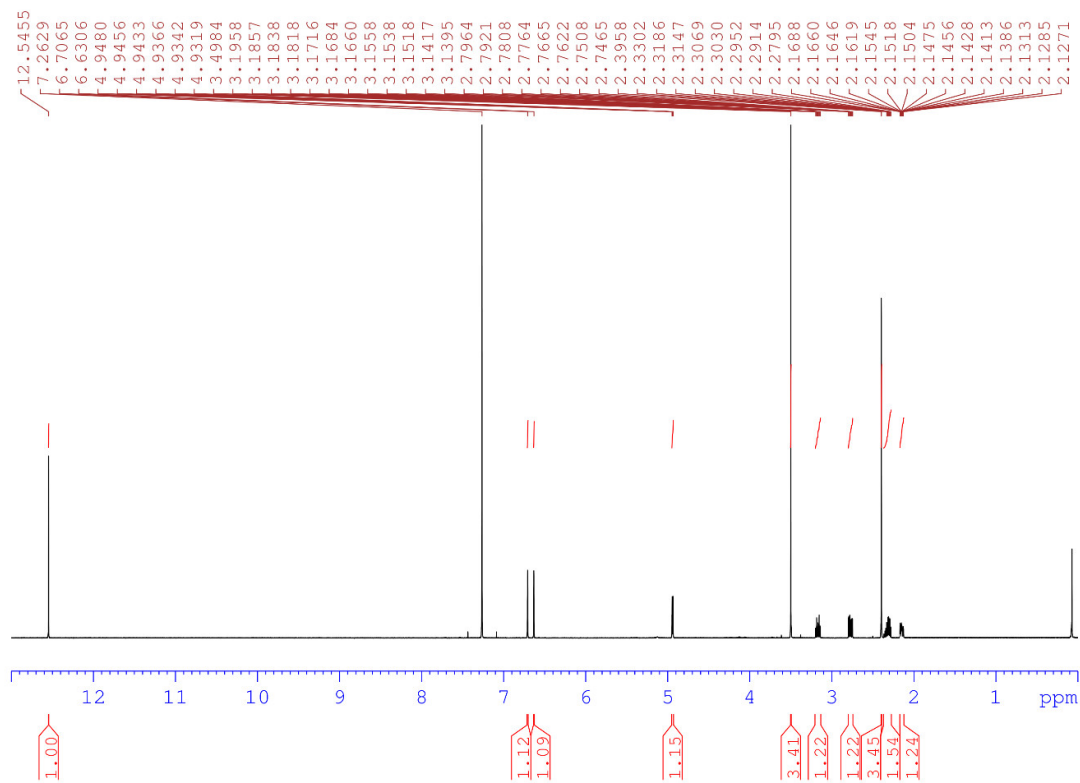

Figure S40.  $^1\text{H}$  NMR spectrum ( $\text{CDCl}_3$ , 600 MHz) of 7.

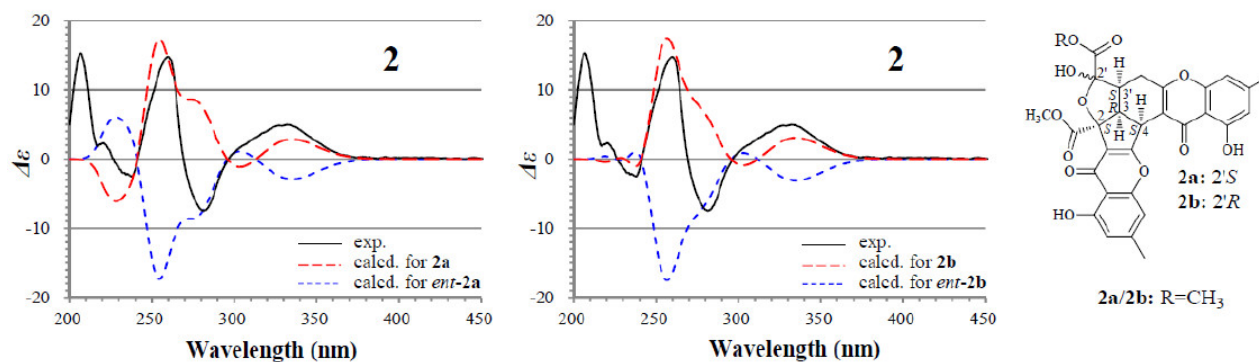

Figure S41. CD and ECD spectra of epiremisporine B.

Table S1.  $^1\text{H}$  NMR spectrum of **4** and epiremisporine B.

| Position    | 4 (2'S) <sup>a</sup>          | 4 (2'R) <sup>a</sup>       | epiremisporine B (2'S) <sup>b</sup> | epiremisporine B (2'R) <sup>b</sup> |
|-------------|-------------------------------|----------------------------|-------------------------------------|-------------------------------------|
|             | $\delta_{\text{H}}$ (J in Hz) |                            |                                     |                                     |
| 3           | 3.92 (t, 9.0)                 | 3.88 (dd, 9.0, 8.3)        | 3.78 (dd, 9.2, 9.0)                 | 3.88 (dd, 9.0, 8.4)                 |
| 4           | 5.19 (d, 9.0)                 | 5.21 (d, 9.0)              | 4.98 (d, 9.0)                       | 5.02 (d, 9.0)                       |
| 8           | 6.68 (br s)                   | 6.69 (br s)                | 6.79 (s)                            | 6.77 (s)                            |
| 10          | 6.60 (br s)                   | 6.61 (br s)                | 6.64 (s)                            | 6.64 (s)                            |
| 15          | 2.33 (s)                      | 2.33 (s)                   | 2.30 (s)                            | 2.28 (s)                            |
| 16          | 3.79 (s)                      | 3.83 (s)                   | 3.69 (s)                            | 3.70 (s)                            |
| 3'          | 3.02 (ddd, 11.7, 9.0, 5.9)    | 2.92 (ddd, 12.7, 8.3, 5.4) | 3.10 (ddd, 10.1, 9.2, 6.4)          | 2.79 (ddd, 12.5, 8.4, 5.9)          |
| 4' $\alpha$ | 2.87 (dd, 16.8, 5.9)          | 2.82 (dd, 16.0, 5.4)       | 2.70 (dd, 17.0, 6.4)                | 2.48 (dd, 15.9, 5.9)                |
| 4' $\beta$  | 2.62 (dd, 16.8, 11.7)         | 2.46 (dd, 16.0, 12.7)      | 2.64 (dd, 17.0, 10.1)               | 2.43 (dd, 15.9, 12.4)               |
| 8'          | 6.71 (br s)                   | 6.70 (br s)                | 6.90 (s)                            | 6.88 (s)                            |
| 10'         | 6.70 (br s)                   | 6.70 (br s)                | 6.71 (s)                            | 6.71 (s)                            |
| 15'         | 2.42 (s)                      | 2.42 (s)                   | 2.38 (s)                            | 2.38 (s)                            |
| 16'         | 3.88 (s)                      | 3.86 (s)                   | 3.74 (s)                            | 3.75 (s)                            |
| 11-OH       | 12.04 (s)                     | 12.00 (s)                  | 12.15 (s)                           | 12.12 (s)                           |
| 2'-OH       | 4.65 (br s)                   | 4.41 (br s)                | 7.80 (s)                            | 7.53 (s)                            |
| 11'-OH      | 12.34 (s)                     | 12.29 (s)                  | 12.49 (s)                           | 12.47 (s)                           |

<sup>a</sup> Recorded in  $\text{CDCl}_3$  at 500 MHz.

<sup>b</sup> Recorded in  $\text{DMSO}-d_6$  at 600 MHz.



**Table S2. <sup>13</sup>C NMR spectrum of 4 and epiremisporeine B.**

| Position | 4 (2'S) <sup>a</sup>  | 4 (2'R) <sup>a</sup>  | epiremisporeine B (2'S) <sup>b</sup> epiremisporeine B (2'R) <sup>b</sup> |                       |
|----------|-----------------------|-----------------------|---------------------------------------------------------------------------|-----------------------|
|          |                       |                       | $\delta_c$ , Type                                                         |                       |
| 1        | 171.0, C              | 172.3, C              | 170.8, C                                                                  | 171.3, C              |
| 2        | 88.7, C               | 90.7, C               | 88.2, C                                                                   | 89.5, C               |
| 3        | 48.3, CH              | 48.2, CH              | 47.0, CH                                                                  | 46.6, CH              |
| 4        | 37.1, CH              | 36.4, CH              | 36.9, CH                                                                  | 36.2, CH              |
| 5        | 168.8, C              | 168.6, C              | 169.3, C                                                                  | 168.9, C              |
| 7        | 157.3, C              | 157.2, C              | 156.8, C                                                                  | 156.8, C              |
| 8        | 108.3, CH             | 108.3, CH             | 108.3, CH                                                                 | 108.3, CH             |
| 9        | 147.3, C              | 147.5, C              | 147.5, C                                                                  | 147.5, C              |
| 10       | 113.1, CH             | 113.2, CH             | 112.3, CH                                                                 | 112.3, CH             |
| 11       | 160.4, C              | 160.8, C              | 159.9, C                                                                  | 159.9, C              |
| 12       | 108.9, C              | 108.9, C              | 108.4, C                                                                  | 108.4, C              |
| 13       | 179.1, C              | 179.0, C              | 178.9, C                                                                  | 178.9, C              |
| 14       | 119.2, C              | 118.5, C              | 119.2, C                                                                  | 118.7, C              |
| 15       | 22.2, CH <sub>3</sub> | 22.2, CH <sub>3</sub> | 21.5, CH <sub>3</sub>                                                     | 21.4, CH <sub>3</sub> |
| 16       | 53.2, CH <sub>3</sub> | 53.6, CH <sub>3</sub> | 52.8, CH <sub>3</sub>                                                     | 52.6, CH <sub>3</sub> |
| 1'       | 169.4, C              | 167.3, C              | 169.4, C                                                                  | 167.7, C              |
| 2'       | 104.8, C              | 105.9, C              | 105.7, C                                                                  | 106.2, C              |
| 3'       | 43.4, CH              | 47.1, CH              | 42.7, CH                                                                  | 47.3, CH              |
| 4'       | 26.3, CH <sub>2</sub> | 27.5, CH <sub>2</sub> | 26.3, CH <sub>2</sub>                                                     | 26.9, CH <sub>2</sub> |
| 5'       | 166.7, C              | 166.0, C              | 168.0, C                                                                  | 167.4, C              |
| 7'       | 156.1, C              | 156.1, C              | 155.5, C                                                                  | 155.6, C              |
| 8'       | 107.6, CH             | 107.6, CH             | 107.6, CH                                                                 | 107.6, CH             |
| 9'       | 147.5, C              | 147.7, C              | 147.4, C                                                                  | 147.4, C              |
| 10'      | 112.6, CH             | 112.6, CH             | 112.0, CH                                                                 | 112.0, CH             |
| 11'      | 160.4, C              | 160.8, C              | 159.5, C                                                                  | 159.6, C              |
| 12'      | 108.4, C              | 108.5, C              | 107.7, C                                                                  | 107.8, C              |
| 13'      | 179.8, C              | 179.7, C              | 179.4, C                                                                  | 179.3, C              |
| 14'      | 112.6, C              | 112.4, C              | 111.9, C                                                                  | 111.7, C              |
| 15'      | 22.4, CH <sub>3</sub> | 22.4, CH <sub>3</sub> | 21.8, CH <sub>3</sub>                                                     | 21.8, CH <sub>3</sub> |
| 16'      | 53.3, CH <sub>3</sub> | 53.1, CH <sub>3</sub> | 52.3, CH <sub>3</sub>                                                     | 52.3, CH <sub>3</sub> |

<sup>a</sup> Recorded in CDCl<sub>3</sub> at 125 MHz. <sup>b</sup> Recorded in DMSO-*d*<sub>6</sub> at 150 MHz.

**Table S3. The ROESY correlations for compounds 1–3.**

| Position | 1 <sup>a</sup>      | 2 <sup>a</sup>      | 3 <sup>a</sup>  |
|----------|---------------------|---------------------|-----------------|
|          | ROESY               |                     |                 |
| 3        | 4, 16, 3', 4'α      | 4, 16, 3', 4'α      | 4, 16, 3', 4'α  |
| 4        | 3                   | 3                   | 3               |
| 8        | 15                  | 15                  | 15              |
| 10       | 15                  | 15, 11-OMe          | 15, 11-OMe      |
| 15       | 8, 10               | 8, 10               | 8, 10           |
| 16       | 3                   | 3                   | 3               |
| 3'       | 3, 4'α, 4'β, 2'-OMe | 3, 4'α, 4'β, 2'-OMe | 3, 4'α, 4'β     |
| 4'α      | 3, 3', 4'β          | 3, 3', 4'β          | 3, 3', 4'β      |
| 4'β      | 3', 4'α             | 3', 4'α             | 3', 4'α, 2'-OMe |
| 8'       | 15'                 | 15'                 | 15'             |
| 10'      | 15'                 | 15'                 | 11'-OH, 15'     |
| 15'      | 8', 10'             | 8', 10'             | 8', 10'         |
| 11-OMe   |                     | 10                  | 10              |
| 2'-OMe   | 3'                  | 3'                  | 4'β             |
| 11'-OH   |                     |                     | 10'             |

<sup>a</sup> Recorded in CDCl<sub>3</sub> at 500 MHz.
